# Supplementary material for: Spatial epigenome–transcriptome co-profiling of mammalian tissues
Source: PubMed Central journal article supplement (PMC10076218; doi:10.1038/s41586-023-05795-1), 2023-03-15
Supplement: 41586_2023_5795_MOESM1_ESM.pdf [file 41586_2023_5795_MOESM1_ESM.pdf]

**Supplementary information**

---

**Spatial epigenome–transcriptome co-profiling of mammalian tissues**

---

In the format provided by the authors and unedited

## Spatial epigenome-transcriptome co-profiling of mammalian tissues

Di Zhang<sup>1,21</sup>, Yanxiang Deng<sup>1,2,20,21,\*</sup>, Petra Kukanja<sup>3</sup>, Eneritz Agirre<sup>3</sup>, Marek Bartosovic<sup>3</sup>, Mingze Dong<sup>4,5</sup>, Cong Ma<sup>6</sup>, Sai Ma<sup>7</sup>, Graham Su<sup>1,2</sup>, Shuozen Bao<sup>1</sup>, Yang Liu<sup>1,2</sup>, Yang Xiao<sup>8</sup>, Gorazd B. Rosoklija<sup>9,10,11</sup>, Andrew J. Dwork<sup>9,10,11,12</sup>, J. John Mann<sup>9,10,13</sup>, Kam W. Leong<sup>8,14</sup>, Maura Boldrini<sup>9,10</sup>, Liya Wang<sup>15</sup>, Maximilian Haeussler<sup>16</sup>, Benjamin J. Raphael<sup>6</sup>, Yuval Kluger<sup>4,5,17</sup>, Gonçalo Castelo-Branco<sup>3,18,\*</sup>, Rong Fan<sup>1,2,4,19,\*</sup>

<sup>1</sup>Department of Biomedical Engineering, Yale University, New Haven, CT 06520, USA

<sup>2</sup>Yale Stem Cell Center and Yale Cancer Center, Yale School of Medicine, New Haven, CT 06520, USA

<sup>3</sup>Laboratory of Molecular Neurobiology, Department of Medical Biochemistry and Biophysics, Karolinska Institutet, Stockholm, Sweden

<sup>4</sup>Department of Pathology, Yale University School of Medicine, New Haven, CT, USA

<sup>5</sup>Interdepartmental Program in Computational Biology and Bioinformatics, Yale University, New Haven, CT, USA

<sup>6</sup>Department of Computer Science, Princeton University, 35 Olden St, Princeton, NJ 08540, USA

<sup>7</sup>Klarman Cell Observatory, Broad Institute of MIT and Harvard, Cambridge, MA 02142, USA

<sup>8</sup>Department of Biomedical Engineering, Columbia University, USA

<sup>9</sup>Department of Psychiatry, Columbia University, New York, NY, 10032 USA

<sup>10</sup>Division of Molecular Imaging and Neuropathology, New York State Psychiatric Institute, New York, NY, 10032 USA

<sup>11</sup>Macedonian Academy of Sciences & Arts, Skopje, Republic of Macedonia

<sup>12</sup>Department of Pathology and Cell Biology, Columbia University, New York, NY, 10032 USA

<sup>13</sup>Department of Radiology, Columbia University, New York, NY, 10032 USA

<sup>14</sup>Department of Systems Biology, Columbia University Irving Medical Center, New York, NY 10032, USA

<sup>15</sup>AtlasXomics Inc., 290 Congress Ave, New Haven, CT 06519, USA

<sup>16</sup>Genomics Institute, University of California Santa Cruz, Santa Cruz, CA, USA

<sup>17</sup>Applied Math Program, Yale University, New Haven, CT, USA

<sup>18</sup>Ming Wai Lau Centre for Reparative Medicine, Stockholm node, Karolinska Institutet, Stockholm, Sweden

<sup>19</sup>Human and Translational Immunology Program, Yale School of Medicine, New Haven, CT 06520, USA

<sup>20</sup>Present address: Department of Pathology and Laboratory Medicine, Epigenetics Institute, Perelman School of Medicine, University of Pennsylvania, Philadelphia, PA 19104, USA

<sup>21</sup>These authors contributed equally.

\*Corresponding authors. Email: rong.fan@yale.edu (R.F.), yanxiang.deng@penncmedicine.upenn.edu (Y.D.), goncalo.castelo-branco@ki.se (G.C.-B.)

## **Table of Contents**

**3** Supplementary Figs. 1-14

**17** Statistics and Reproducibility

**18** Supplementary Table 1 (legend included, table in separate Excel file)

**19** Supplementary Tables 2-7

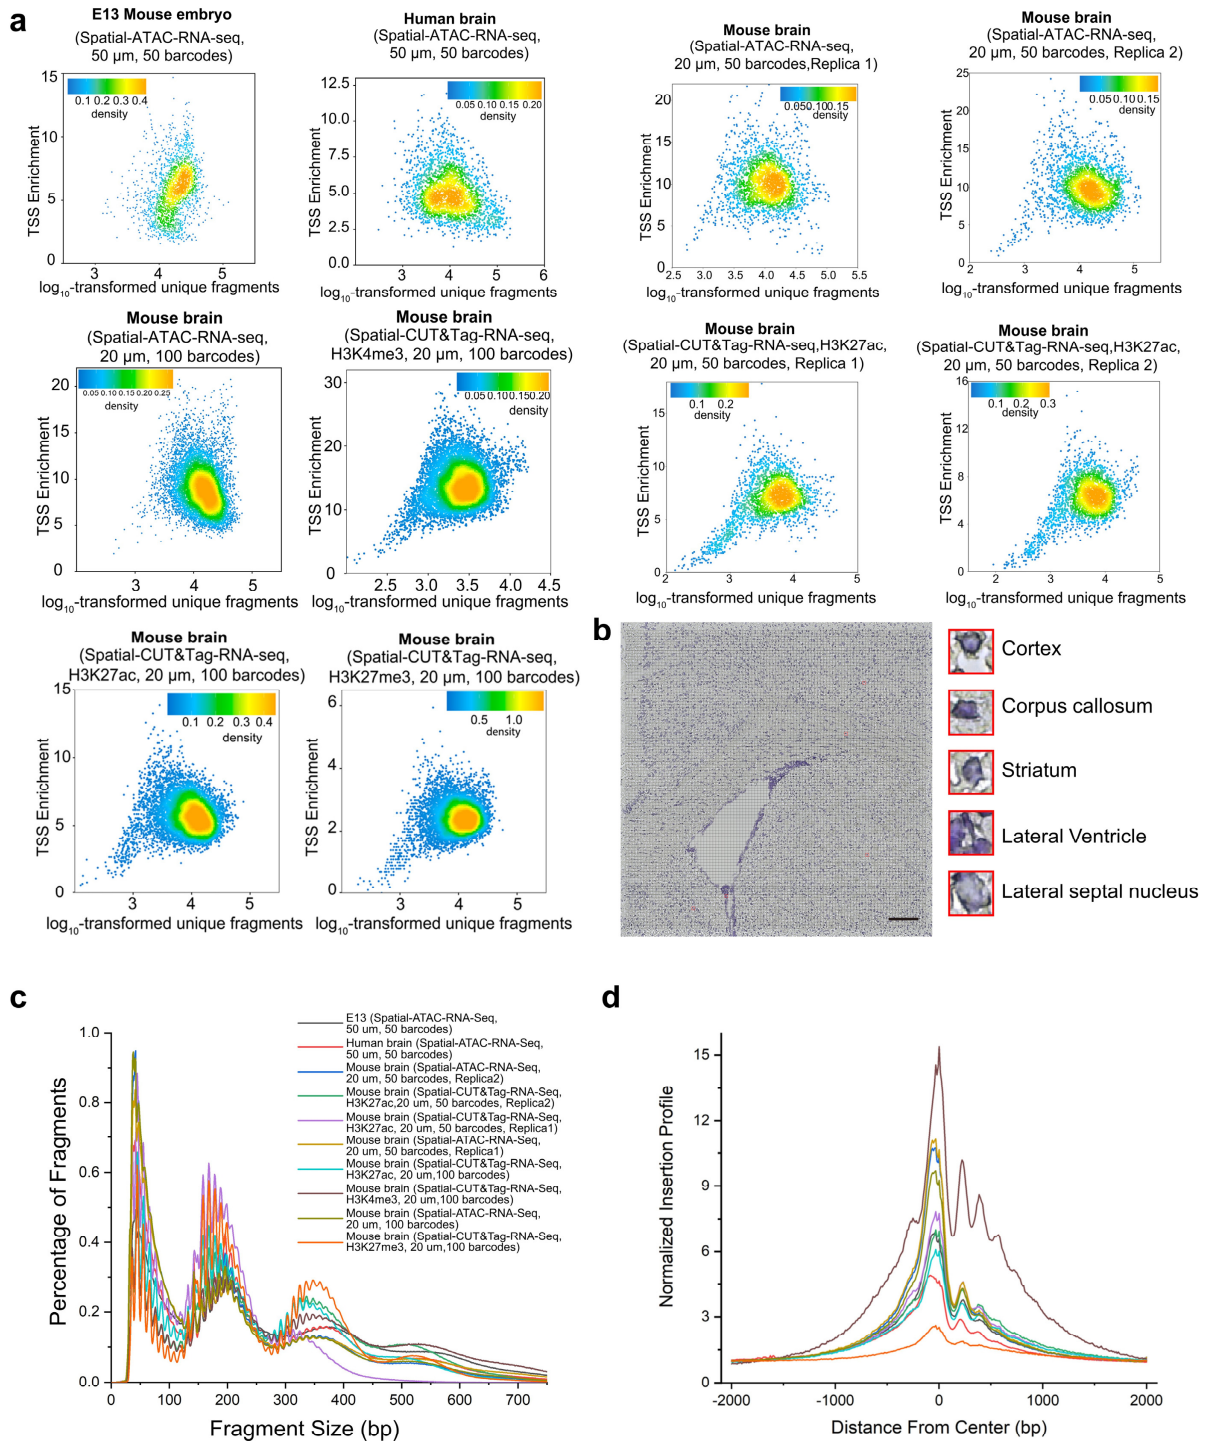

**Supplementary Fig. 1 Quality control metrics for spatial-ATAC-RNA-seq and spatial-CUT&Tag-RNA-seq datasets.** **a**, Scatterplots showing the TSS enrichment score vs unique nuclear fragments per pixel. **b**, Nissl-stained image from an adjacent tissue section of P21 mouse brain. The grid has an interval of 20  $\mu\text{m}$ . Scale bar, 200  $\mu\text{m}$ . **c**, The insert size distribution of ATAC or CUT&Tag fragments in spatial-ATAC-RNA-seq or spatial-CUT&Tag-RNA-seq. **d**, The enrichment of ATAC or CUT&Tag reads around TSSs in spatial-ATAC-RNA-seq or spatial-CUT&Tag-RNA-seq.

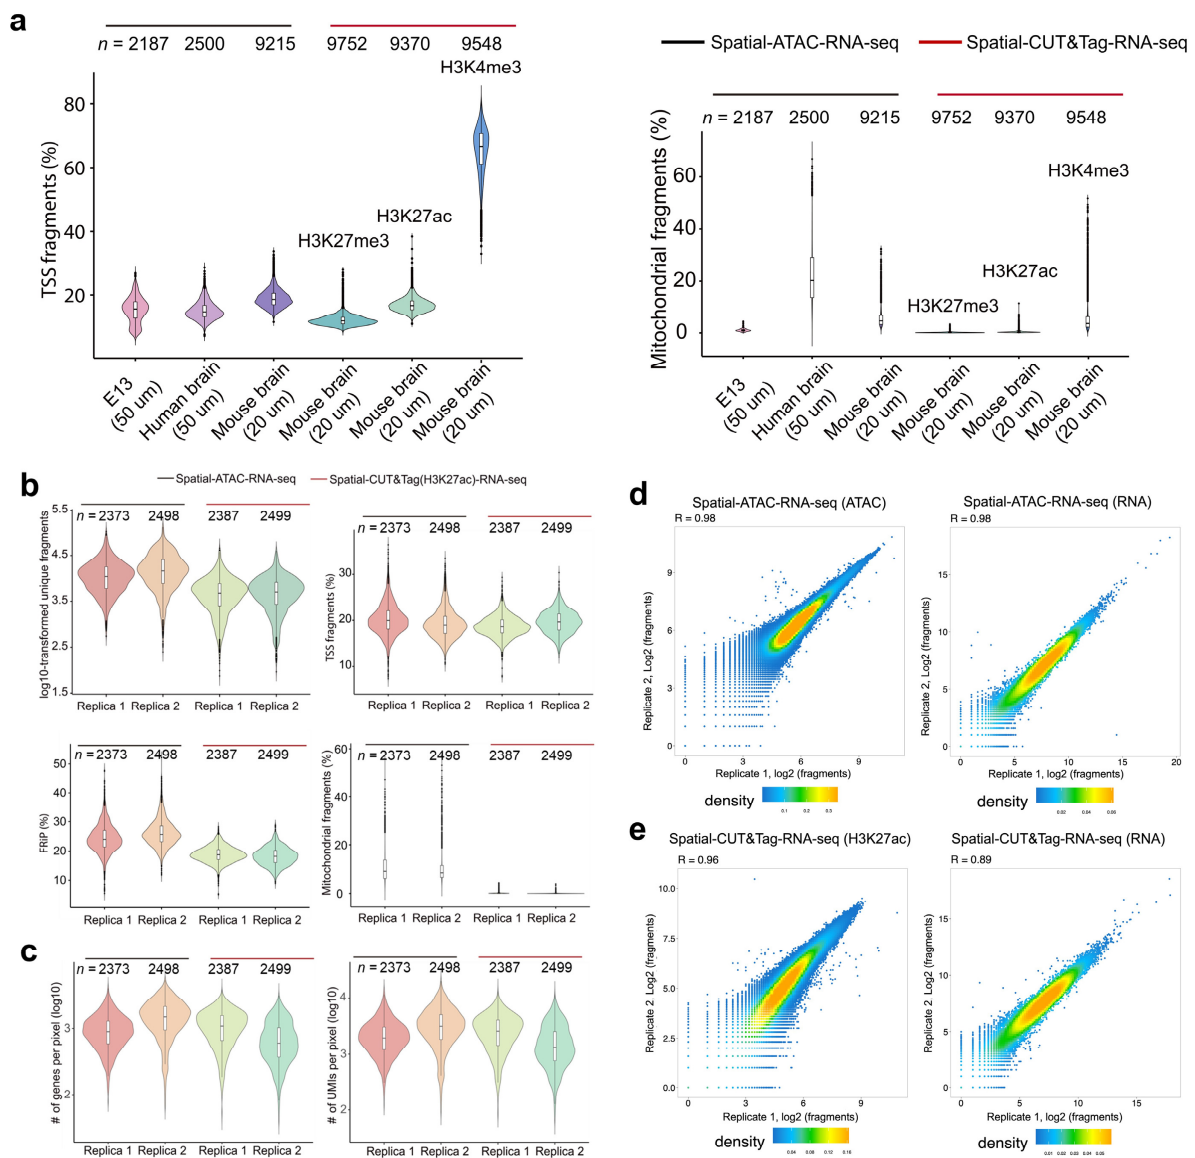

**Supplementary Fig. 2 Quality control metrics for spatial-ATAC-RNA-seq and spatial-CUT&Tag-RNA-seq datasets.** **a**, Comparison of TSS fragments and fraction of mitochondrial fragments in spatial-ATAC-RNA-seq and spatial-CUT&Tag-RNA-seq. **b**, Comparison of number of unique fragments, TSS fragments, fraction of reads in peaks (FRiP), and fraction of mitochondrial fragments between biological replicates for spatial-ATAC-RNA-seq and spatial-CUT&Tag(H3K27ac)-RNA-seq. **c**, Gene and UMI count distribution between biological replicates for spatial-ATAC-RNA-seq and spatial-CUT&Tag(H3K27ac)-RNA-seq. The box plots show the median (centre line), the first and third quartiles (box limits), and 1.5x the interquartile range (whiskers). **d**, The reproducibility of spatial-ATAC-RNA-seq between biological replicates on ATAC data (left) and RNA data (right) for P21 mouse brain. **e**, The reproducibility of spatial-CUT&Tag-RNA-seq between biological replicates on CUT&Tag data (left) and RNA data (right) for P21 mouse brain.

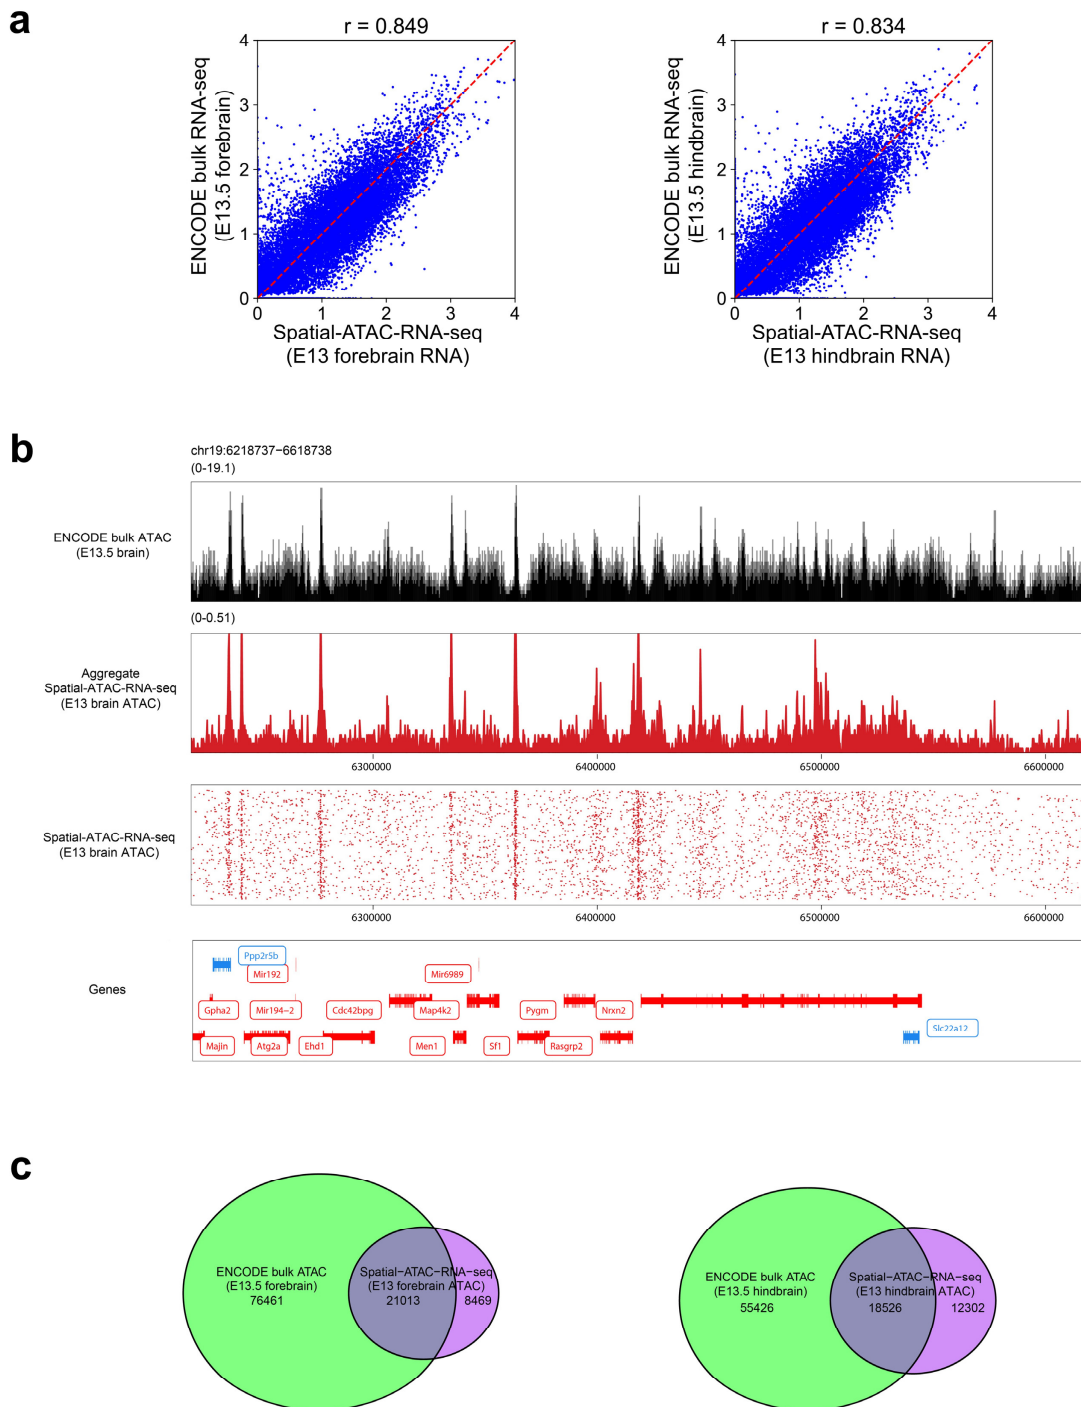

**Supplementary Fig. 3 Benchmarking of data quality in spatial-ATAC-RNA-seq. a,** Comparison of transcriptional profiles between RNA in spatial-ATAC-RNA-seq and the ENCODE RNA-Seq data in brain of mouse embryo. **b,** Aggregated spatial chromatin accessibility profiles in spatial-ATAC-RNA-seq recapitulated ENCODE ATAC-seq profiles in brain of mouse embryo. **c,** Venn diagrams showing the overlap of peaks from ATAC in spatial-ATAC-RNA-seq and ENCODE ATAC-seq in brain of mouse embryo.

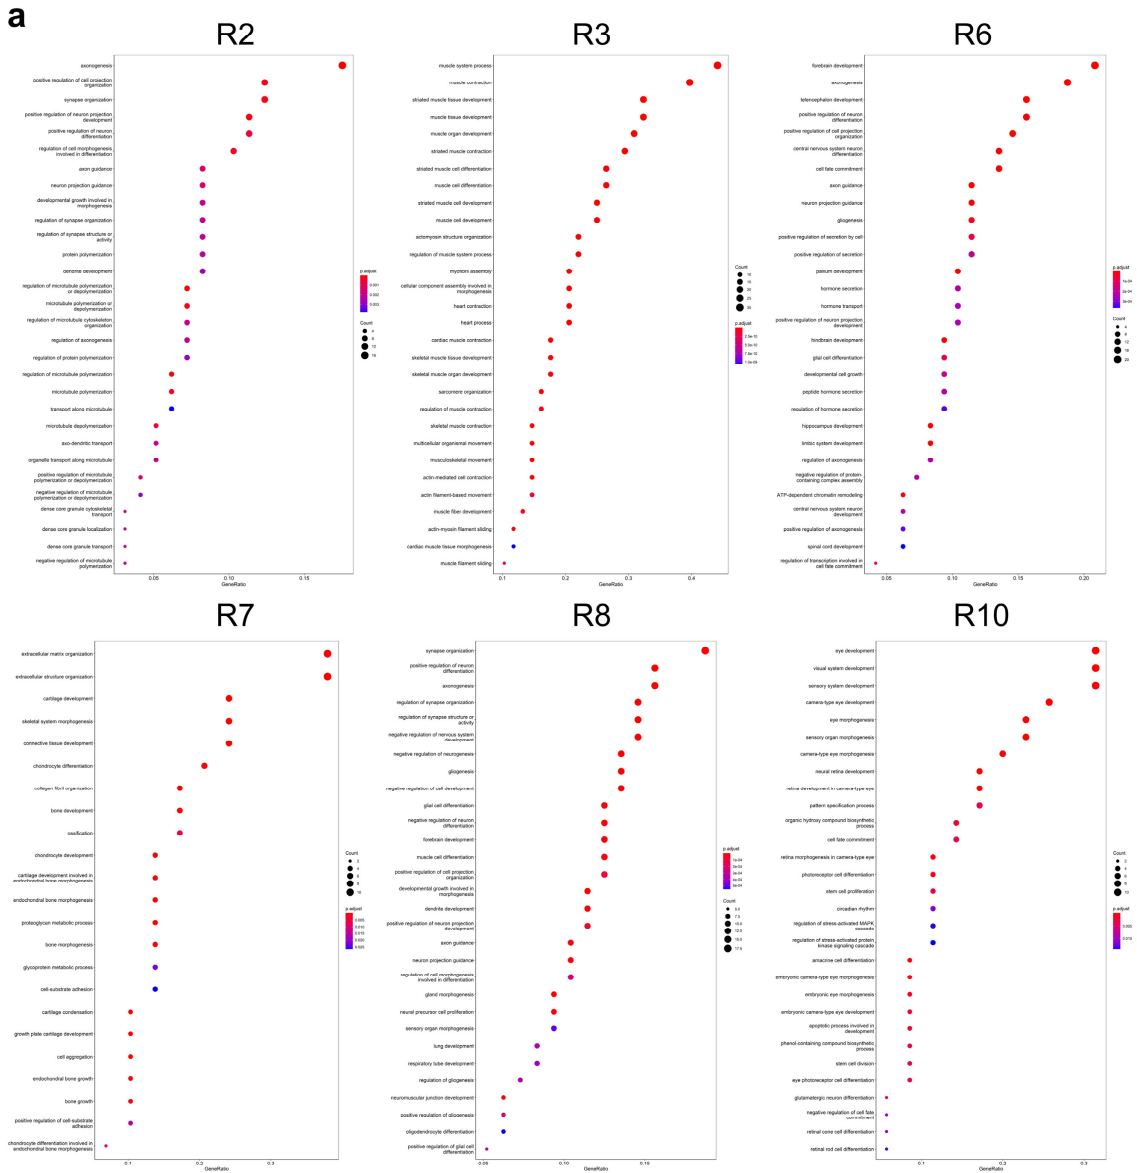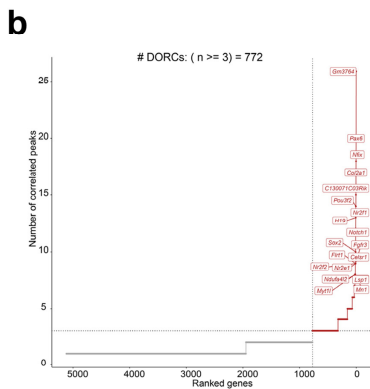

**Supplementary Fig. 4 Further analysis of spatial-ATAC-RNA-seq for E13 mouse embryo.**  
**a**, GO enrichment analysis in selected RNA clusters from spatial-ATAC-RNA-seq for E13 mouse embryo (One-sided version of Fisher’s exact test, p-value was adjusted for multiple comparisons by Benjamini & Hochberg method). **b**, The number of significantly correlated peaks for each gene.

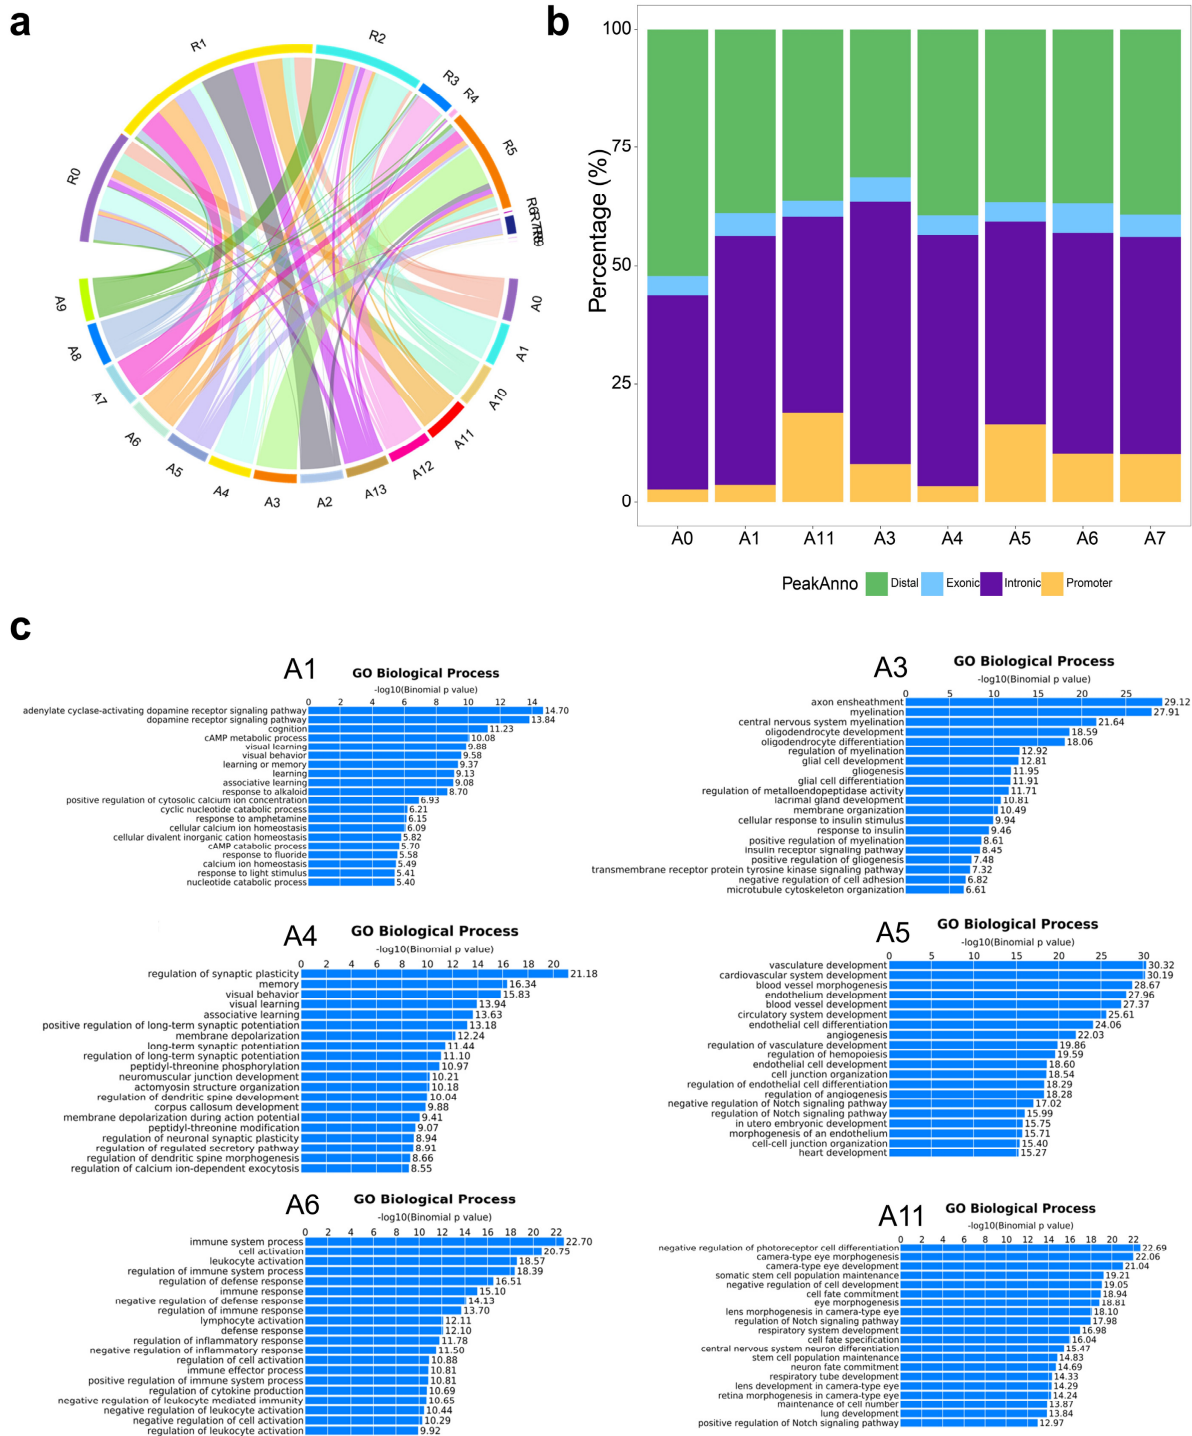

**Supplementary Fig. 5 Further analysis of spatial-ATAC-RNA-seq for P22 mouse brain.**  
**a**, Ribbon plot showing the relationship between ATAC and RNA clusters in spatial-ATAC-RNA-seq. **b**, Annotation of marker peaks in different clusters. **c**, GREAT enrichment analysis of marker peaks in different clusters (Binomial and hypergeometric tests).



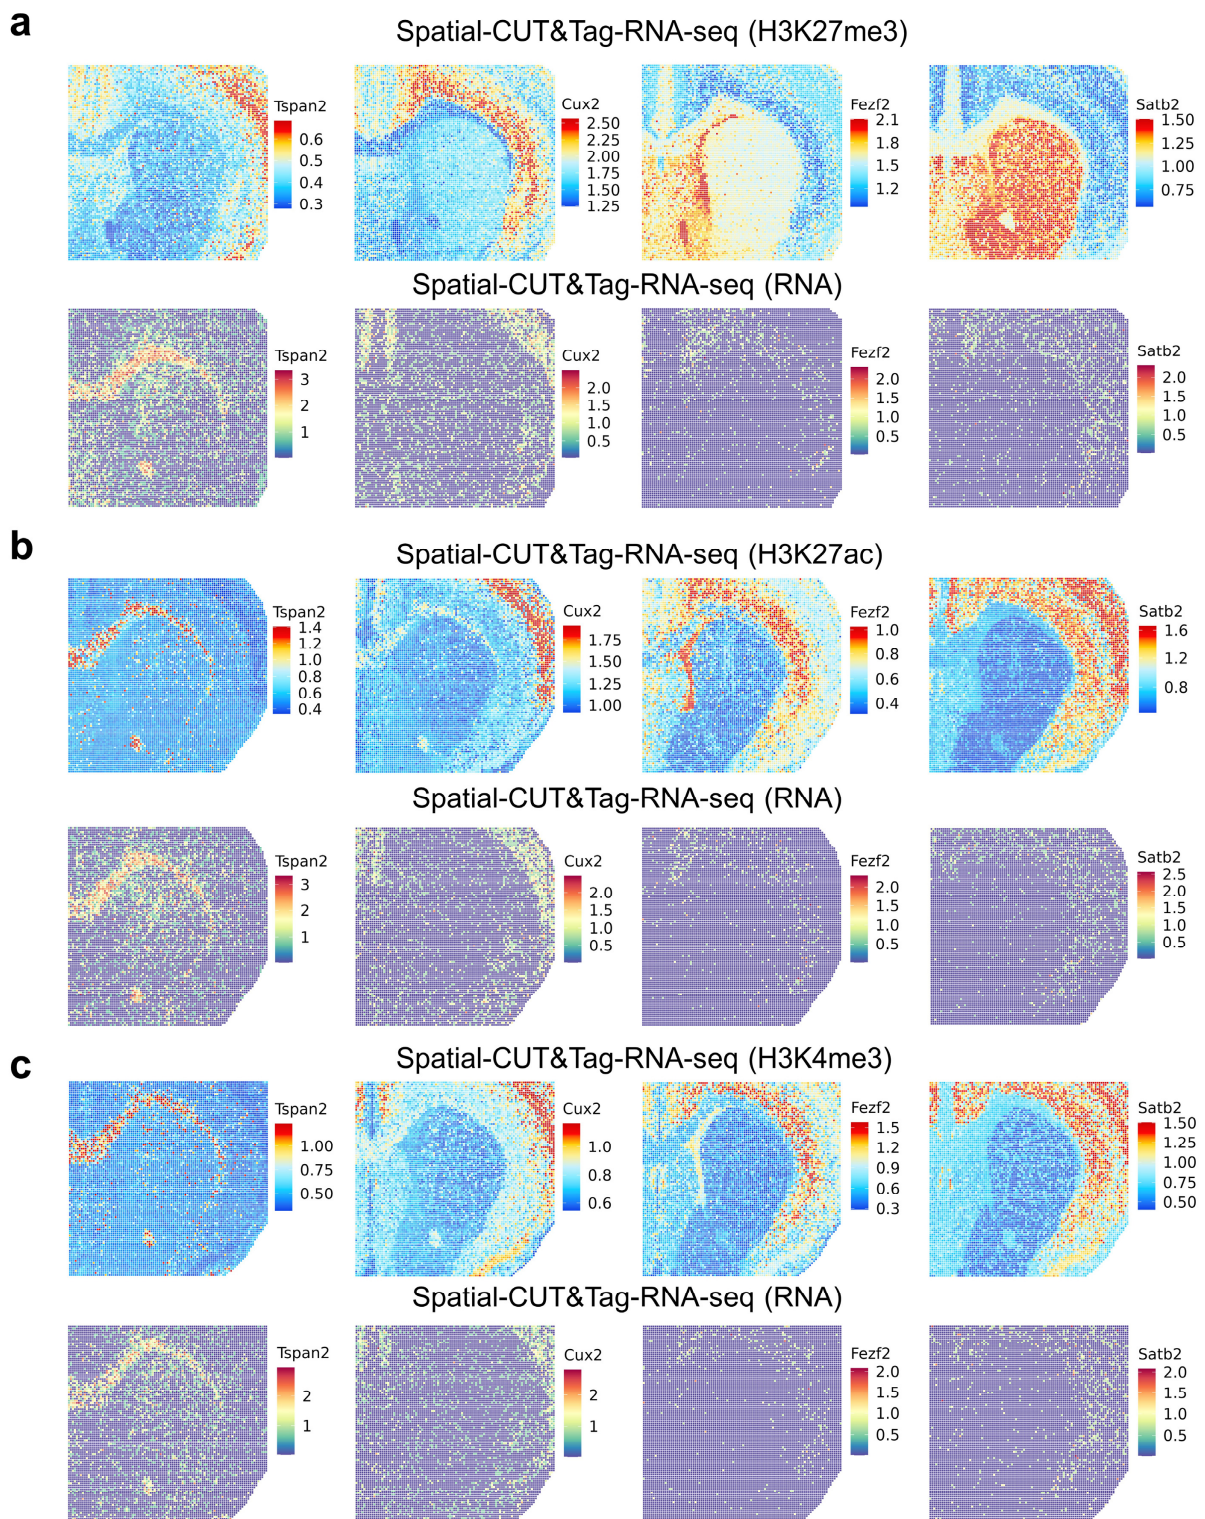

**Supplementary Fig. 6 Spatial mapping of CSS, GAS, and gene expression of selected genes in spatial-CUT&Tag-RNA-seq for P22 mouse brain. a-c, Spatial mapping of CSS or GAS, and gene expression for selected marker genes in spatial-CUT&Tag(H3K27me3)-RNA-seq (a), spatial-CUT&Tag(H3K27ac)-RNA-seq (b), and spatial-CUT&Tag(H3K4me3)-RNA-seq (c).**

**a**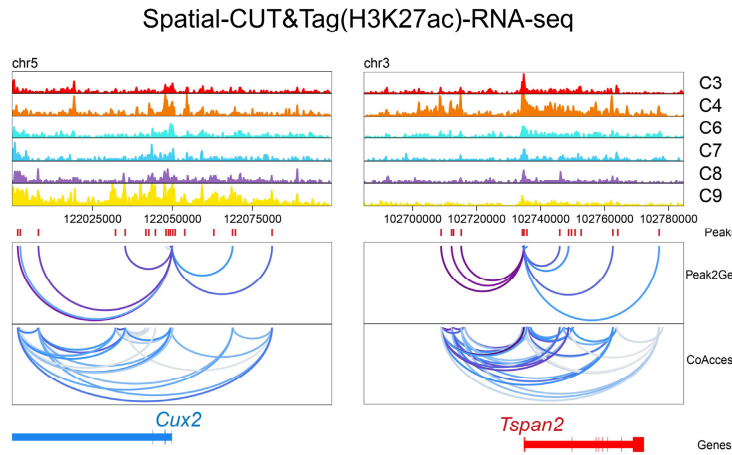**b**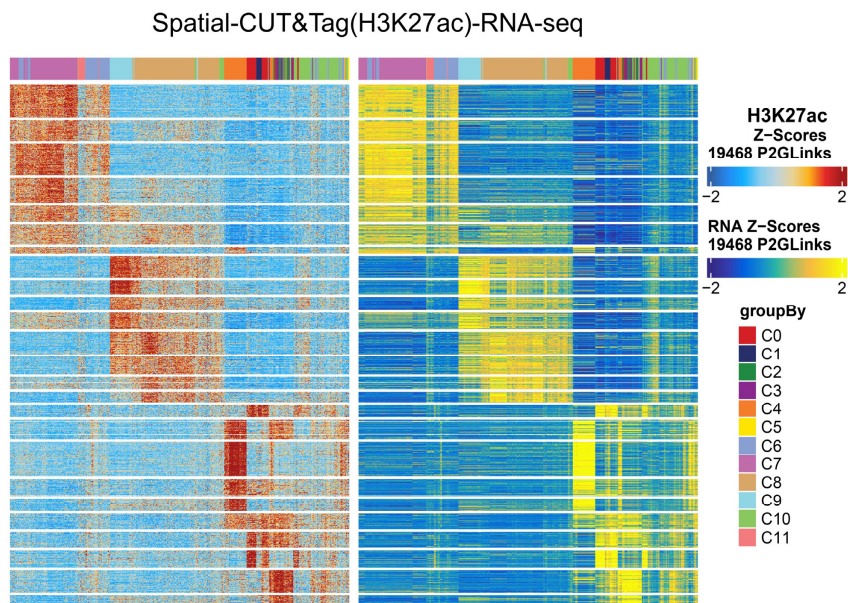**c**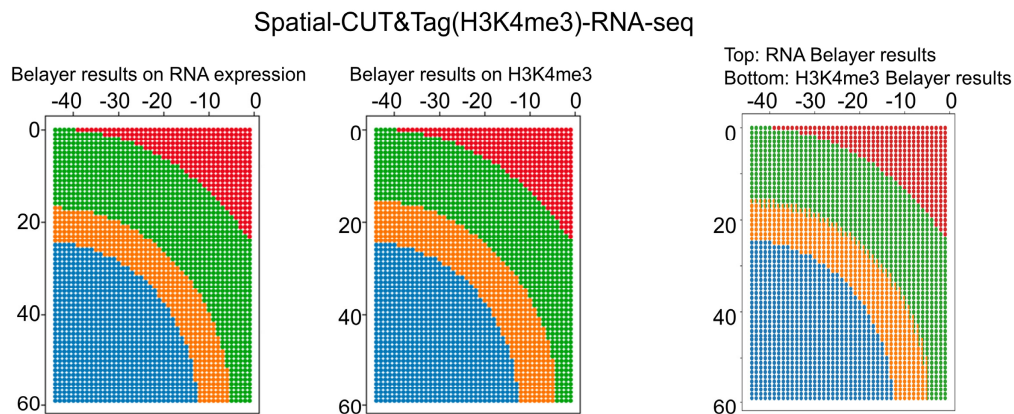

**Supplementary Fig. 7 Further analysis for spatial-CUT&Tag-RNA-seq with P22 mouse brain.** **a**, Genome track visualization of marker genes with peak-to-gene links for distal regulatory elements and peak co-accessibility. **b**, Heatmaps of peak-to-gene links in spatial-CUT&Tag(H3K27ac)-RNA-seq. **c**, The layers identified by Belayer from the top right mapping region of the P22 mouse brain. Evaluate the consistency between the two Belayer results (right) by adjusted rand index (ARI): ARI = 0.915.

# Spatial-CUT&Tag(H3K27me3)-RNA-seq

## GO for corpus callosum

### Quadrant I

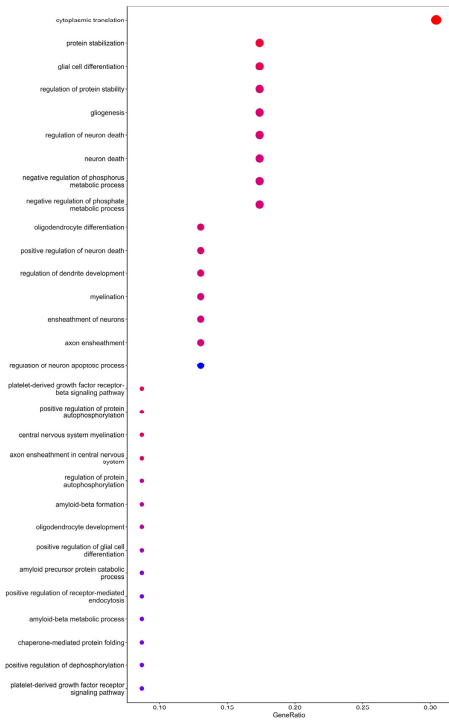

### Quadrant II

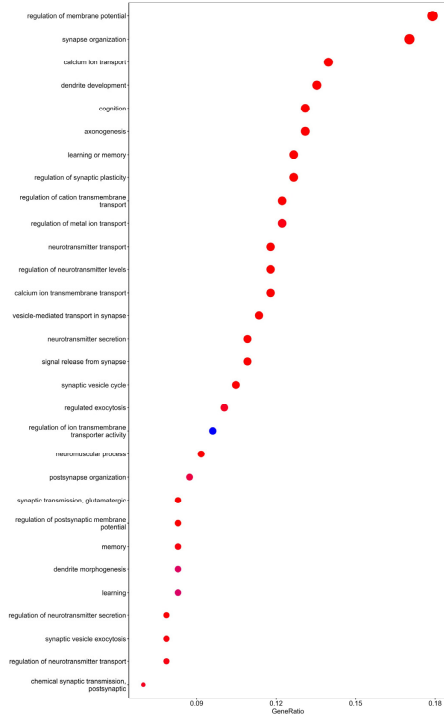

### Quadrant IV

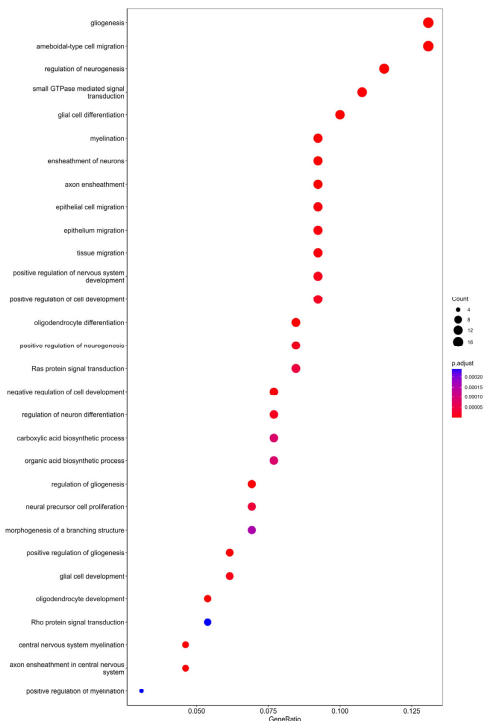

**Supplementary Fig. 8 GO enrichment analysis of P22 mouse brain.** GO enrichment analysis of genes from Fig. 4a (One-sided version of Fisher's exact test, p-value was adjusted for multiple comparisons by Benjamini & Hochberg method).

**a**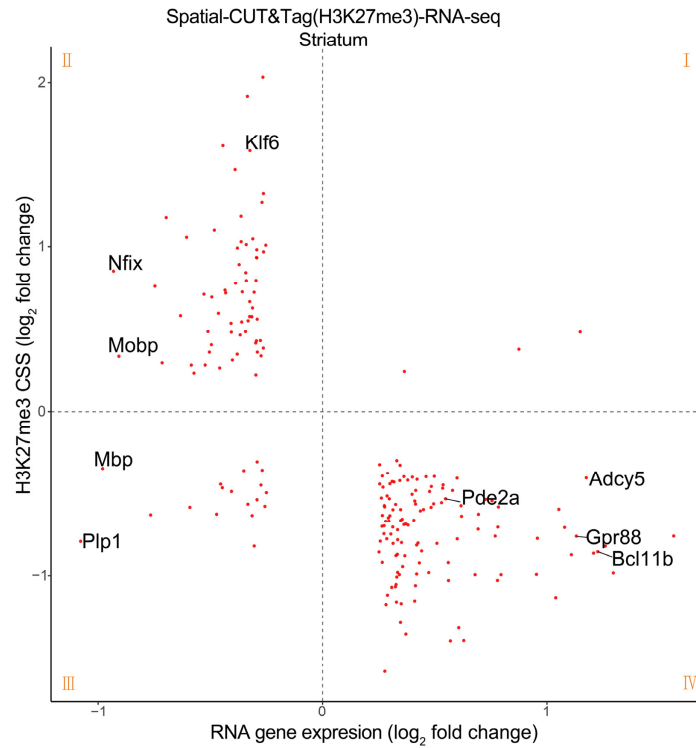**b**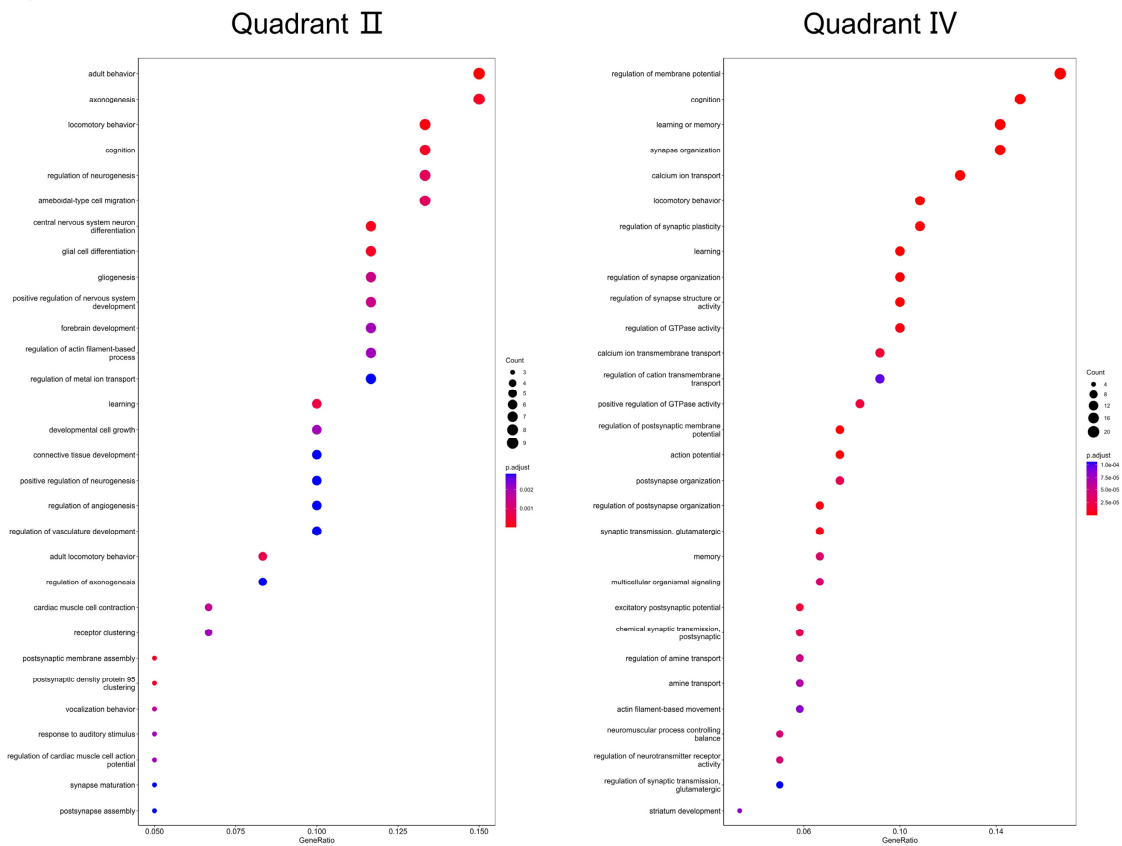

**Supplementary Fig. 9 Further analysis for epigenetic regulation of gene expression with P22 mouse brain. a**, Correlation analysis of H3K27me3 CSS and RNA gene expression in striatum. **b**, GO enrichment analysis of genes from (a) (One-sided version of Fisher's exact test, p-value was adjusted for multiple comparisons by Benjamini & Hochberg method).

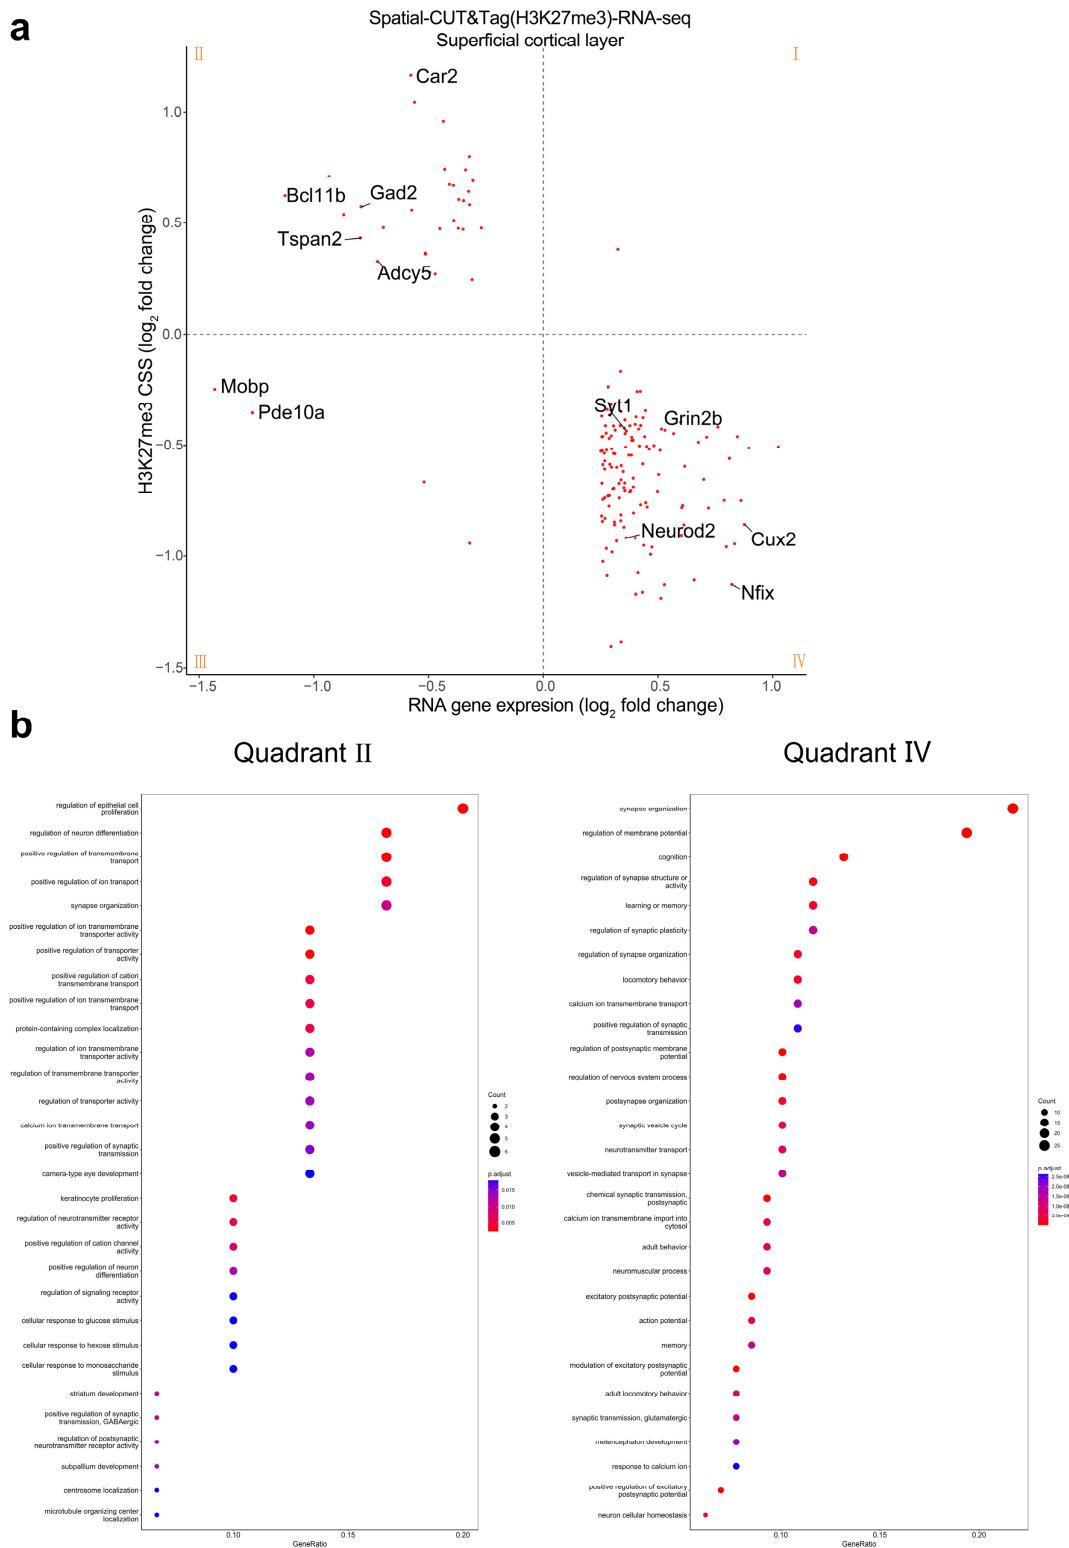

**Supplementary Fig. 10 Further analysis for epigenetic regulation of gene expression with P22 mouse brain. a**, Correlation analysis of H3K27me3 CSS and RNA gene expression in superficial cortical layer. **b**, GO enrichment analysis of genes from (a) (One-sided version of Fisher's exact test, p-value was adjusted for multiple comparisons by Benjamini & Hochberg method).

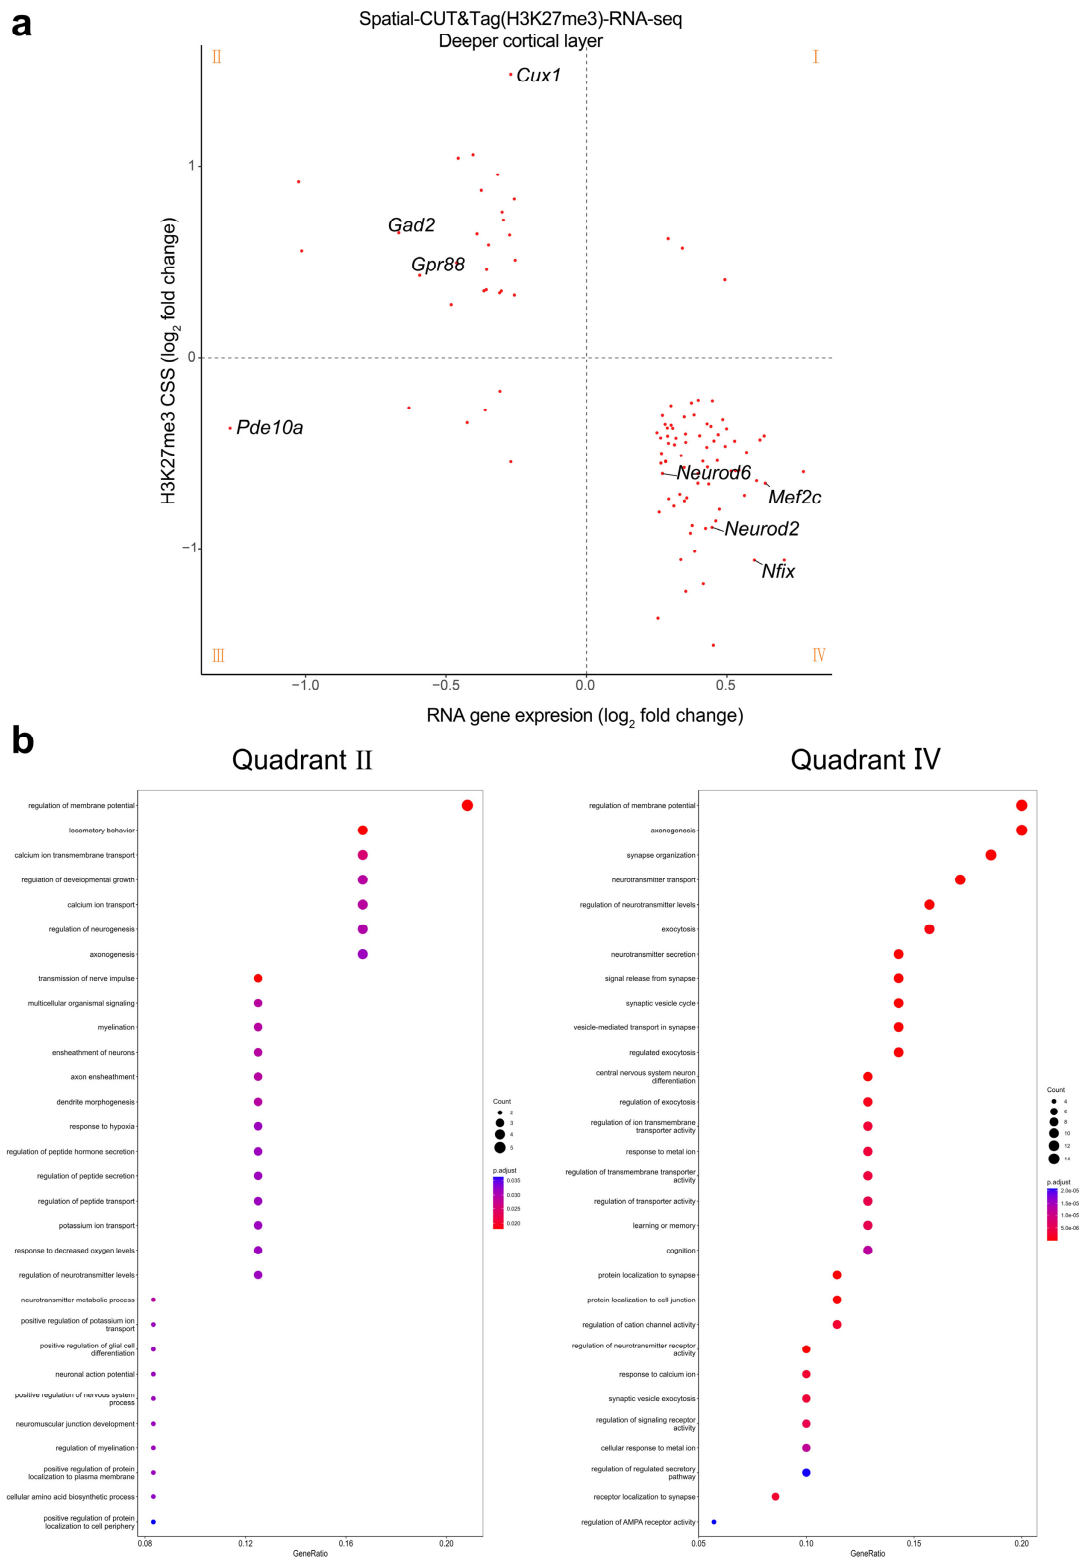

**Supplementary Fig. 11 Further analysis for epigenetic regulation of gene expression with P22 mouse brain. a**, Correlation analysis of H3K27me3 CSS and RNA gene expression in deeper cortical layer. **b**, GO enrichment analysis of genes from (a) (One-sided version of Fisher's exact test, p-value was adjusted for multiple comparisons by Benjamini & Hochberg method).

## GO for corpus callosum

Spatial-CUT&Tag(H3K27ac)-RNA-seq

Spatial-CUT&Tag(H3K4me3)-RNA-seq

Quadrant I

Quadrant I

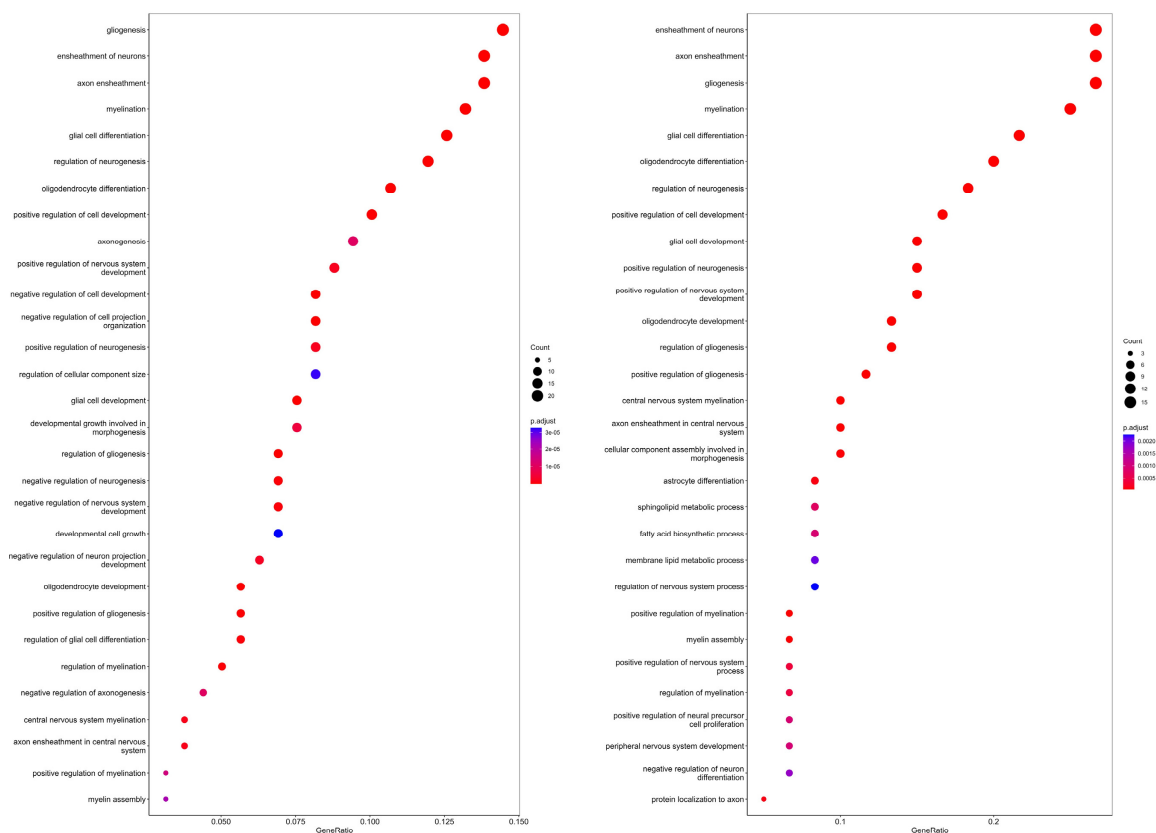

**Supplementary Fig. 12 Further analysis for epigenetic regulation of gene expression with P22 mouse brain.** GO enrichment analysis of genes from Fig. 4b,c (One-sided version of Fisher's exact test, p-value was adjusted for multiple comparisons by Benjamini & Hochberg method).

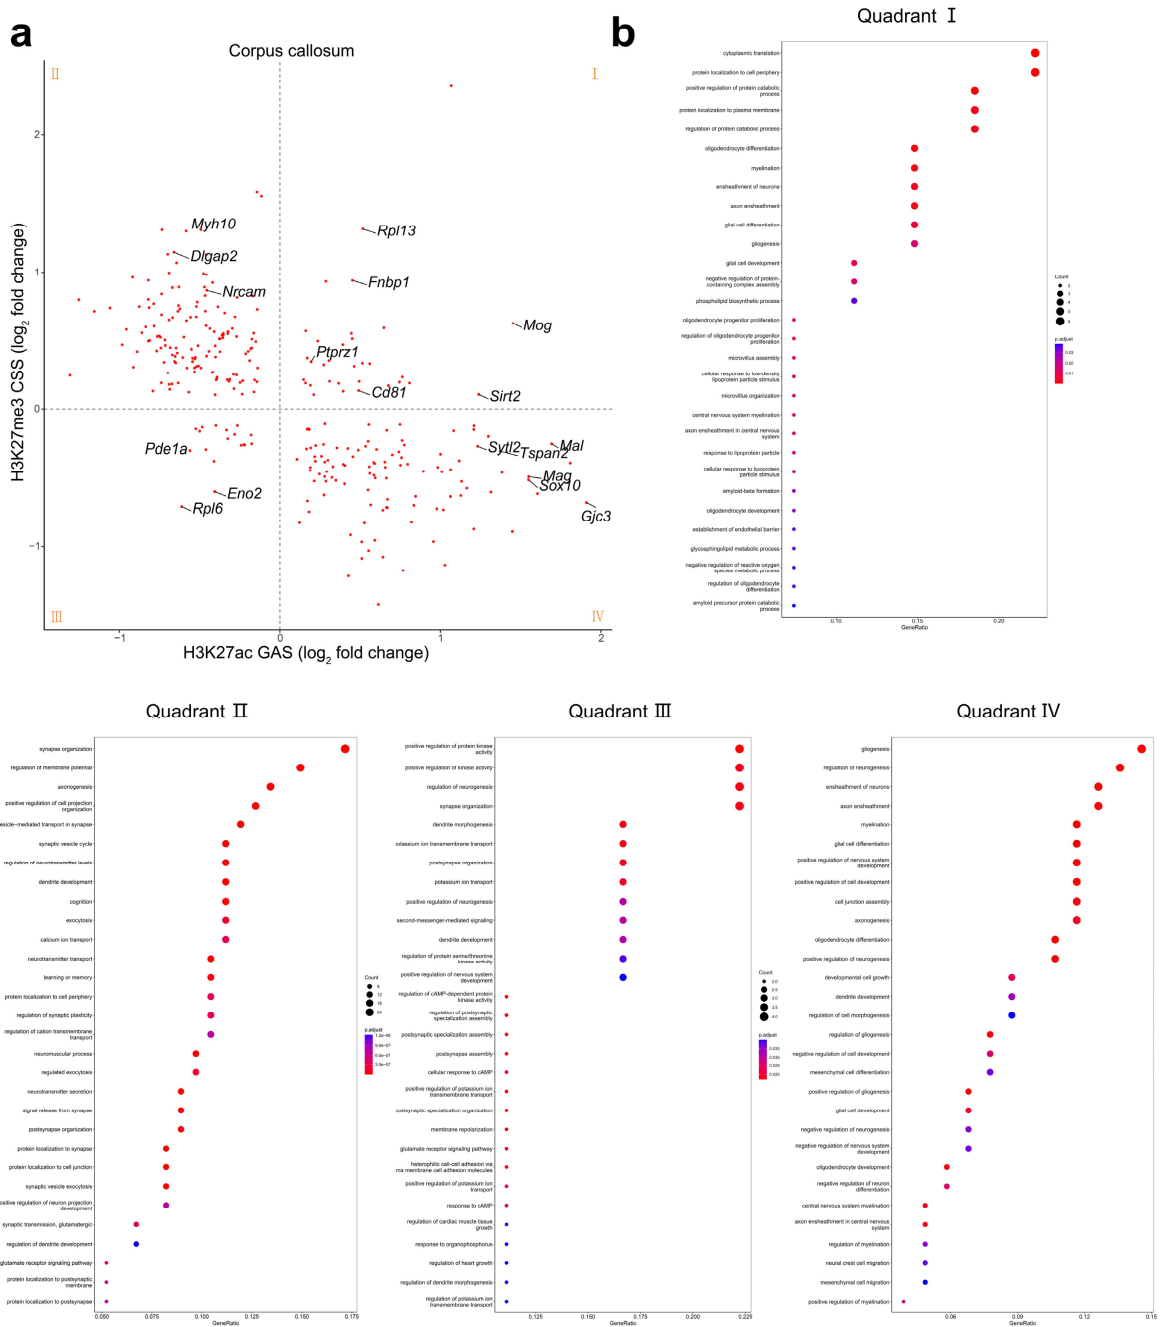

**Supplementary Fig. 13 Further analysis for epigenetic regulation of gene expression with P22 mouse brain. a**, Correlation analysis of H3K27me3 CSS and H3K27ac GAS in corpus callosum. **b**, GO enrichment analysis of genes from (a) (One-sided version of Fisher's exact test, p-value was adjusted for multiple comparisons by Benjamini & Hochberg method).



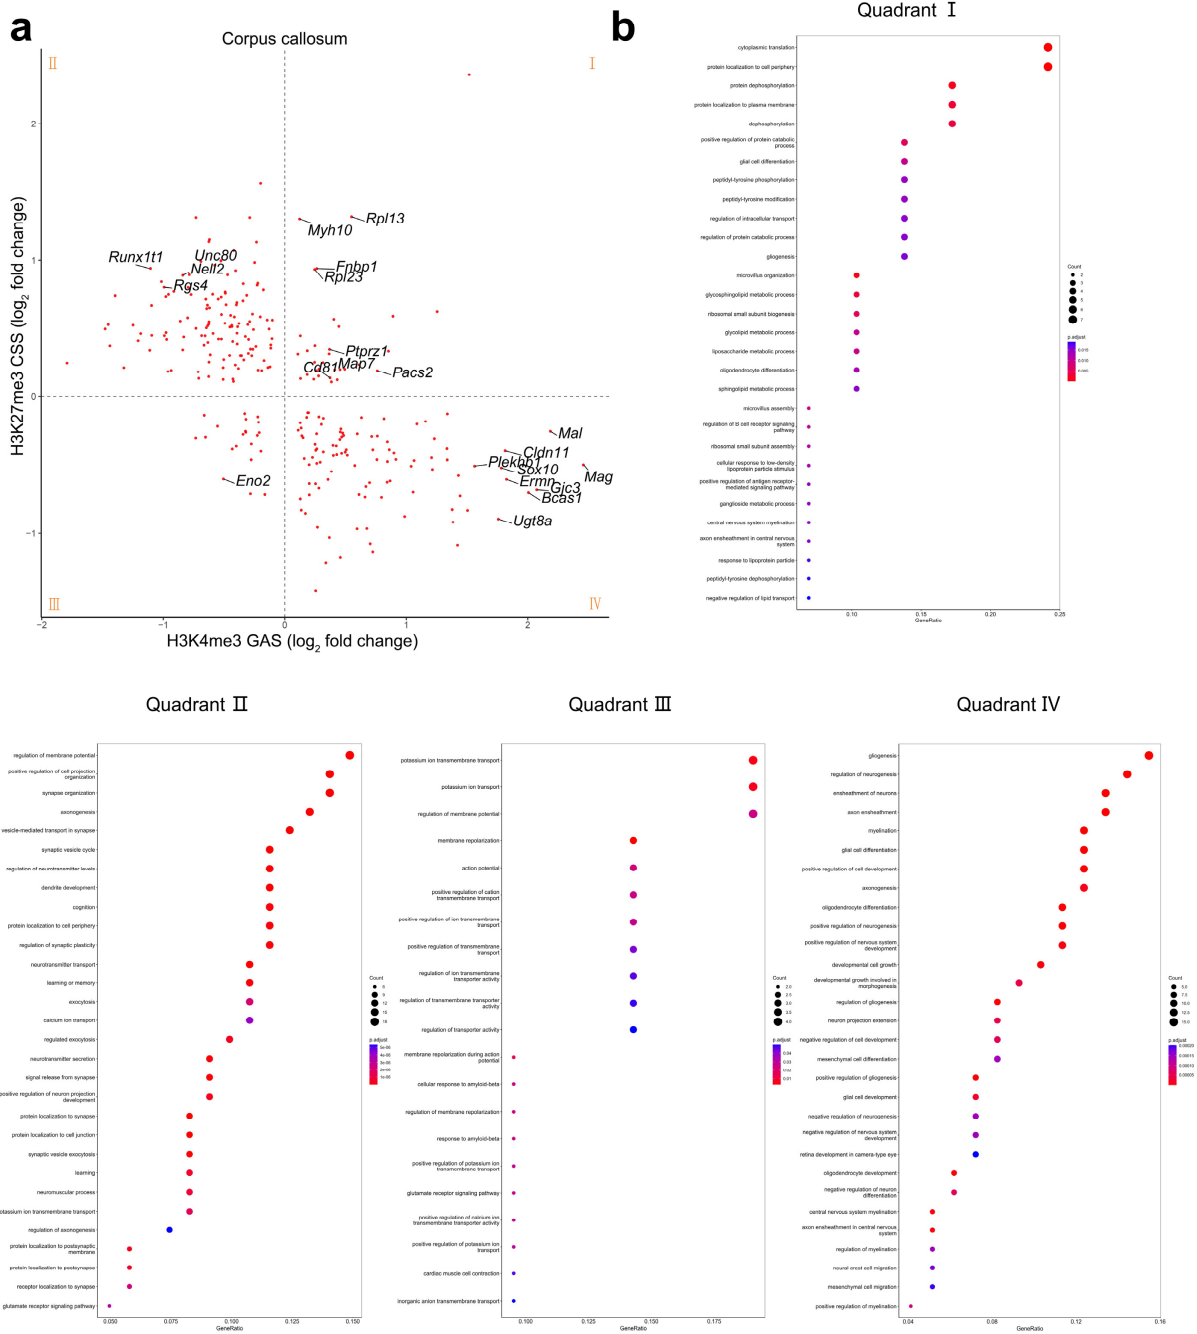

**Supplementary Fig. 14 Further analysis for epigenetic regulation of gene expression with P22 mouse brain. a, Correlation analysis of H3K27me3 CSS and H3K4me3 GAS in corpus callosum. b, GO enrichment analysis of genes from (a) (One-sided version of Fisher's exact test, p-value was adjusted for multiple comparisons by Benjamini & Hochberg method).**

## Statistics and Reproducibility

| <b>Figure</b>                                      | <b>Description</b>                      | <b># of times repeated</b> |
|----------------------------------------------------|-----------------------------------------|----------------------------|
| Fig. 2b,3a                                         | Nissl-stained image of P22 mouse brain  | 1                          |
| Fig. 3b,c                                          | Nissl-stained image of P22 mouse brain  | 1                          |
| Fig. 5a, Extended Data Fig. 10a                    | Bright field image of human hippocampus | 1                          |
| Extended Data Fig. 2a                              | H&E image of E13 mouse embryo           | 1                          |
| Extended Data Fig. 2d                              | Bright field image of E13 mouse embryo  | 1                          |
| Extended Data Fig. 4c,d                            | Bright field image of P22 mouse brain   | 1                          |
| Extended Data Fig. 6a,b,c                          | Bright field image of P21 mouse brain   | 1                          |
| Extended Data Fig. 6d,8d,<br>Supplementary Fig. 1b | Nissl-stained image of P21 mouse brain  | 1                          |
| Extended Data Fig. 8a,b,c                          | Bright field image of P21 mouse brain   | 1                          |

**Supplementary Table 1.** A list of cell type annotations in mouse brain.

**Supplementary Table 2. Summary of metrics for ATAC and RNA in spatial-ATAC-RNA-seq for all the samples.**

|                      |      | E13 mouse embryo (50 barcodes, 50 $\mu\text{m}$ pixel size) | P22 mouse brain (100 barcodes, 20 $\mu\text{m}$ pixel size) | P21 mouse brain (replica 1, 50 barcodes, 20 $\mu\text{m}$ pixel size) | P21 mouse brain (replica 2, 50 barcodes, 20 $\mu\text{m}$ pixel size) | Human brain (50 barcodes, 50 $\mu\text{m}$ pixel size) |        |
|----------------------|------|-------------------------------------------------------------|-------------------------------------------------------------|-----------------------------------------------------------------------|-----------------------------------------------------------------------|--------------------------------------------------------|--------|
| Spatial-ATAC-RNA-seq | ATAC | Number of Unique fragments                                  | 18,079                                                      | 14,284                                                                | 10,857                                                                | 14,385                                                 | 9,898  |
|                      |      | TSS fragments                                               | 16%                                                         | 19%                                                                   | 20%                                                                   | 19%                                                    | 15%    |
|                      |      | FRiP                                                        | 11%                                                         | 26%                                                                   | 24%                                                                   | 26%                                                    | 11%    |
|                      |      | Mitochondrial fragments                                     | 0.96%                                                       | 4.6%                                                                  | 9%                                                                    | 8.4%                                                   | 20%    |
|                      | RNA  | Average number of genes per pixel                           | 1,255                                                       | 1,073                                                                 | 1,005                                                                 | 1,600                                                  | 1,200  |
|                      |      | Average number of UMIs per pixel                            | 3,603                                                       | 2,358                                                                 | 2,391                                                                 | 3,811                                                  | 2,809  |
|                      |      | Number of unique genes present                              | 20,900                                                      | 22,914                                                                | 19,859                                                                | 20,046                                                 | 29,293 |
|                      |      | Pixels on tissue                                            | 2,187                                                       | 9,215                                                                 | 2,373                                                                 | 2,498                                                  | 2,500  |

**Supplementary Table 3. Summary of metrics for CUT&Tag and RNA in spatial-CUT&Tag-RNA-seq for all the samples.**

| Spatial-CUT&Tag-RNA-seq |         |                                   | P22 mouse brain (H3K27me3) (100 barcodes, 20 $\mu$ m pixel size) | P22 mouse brain (H3K27ac) (100 barcodes, 20 $\mu$ m pixel size) | P22 mouse brain (H3K4me3) (100 barcodes, 20 $\mu$ m pixel size) | P21 mouse brain (H3K27ac, replica 1) (50 barcodes, 20 $\mu$ m pixel size) | P21 mouse brain (H3K27ac, replica 2) (50 barcodes, 20 $\mu$ m pixel size) |
|-------------------------|---------|-----------------------------------|------------------------------------------------------------------|-----------------------------------------------------------------|-----------------------------------------------------------------|---------------------------------------------------------------------------|---------------------------------------------------------------------------|
|                         | CUT&Tag | Number of Unique fragments        | 10,644                                                           | 10,002                                                          | 2,507                                                           | 4,756                                                                     | 5,022                                                                     |
|                         |         | TSS fragments                     | 12%                                                              | 17%                                                             | 67%                                                             | 19%                                                                       | 20%                                                                       |
|                         |         | FRiP                              | 12%                                                              | 21%                                                             | 54%                                                             | 19%                                                                       | 18%                                                                       |
|                         |         | Mitochondrial fragments           | 0.2%                                                             | 0.3%                                                            | 3.6%                                                            | 0.1%                                                                      | 0.02%                                                                     |
|                         | RNA     | Average number of genes per pixel | 2,011                                                            | 1,513                                                           | 1,329                                                           | 1,145                                                                     | 752                                                                       |
|                         |         | Average number of UMIs per pixel  | 4,734                                                            | 3,580                                                           | 2,885                                                           | 2,938                                                                     | 1,890                                                                     |
|                         |         | Number of unique genes present    | 25,881                                                           | 23,415                                                          | 22,731                                                          | 19,831                                                                    | 18,718                                                                    |
|                         |         | Pixels on tissue                  | 9,752                                                            | 9,370                                                           | 9,548                                                           | 2,387                                                                     | 2,499                                                                     |

**Supplementary Table 4. DNA oligos used for PCR and preparation of sequencing library.**

|                   |                                                                                               |
|-------------------|-----------------------------------------------------------------------------------------------|
| RT primer         | /5Phos/CATCGGCGTACGACTNNNNNNNNN/iBiodT/TTTTTTTTTTTTTT<br>VN                                   |
| Ligation linker 1 | AGTCGTACGCCGATGCGAAACATCGGCCAC                                                                |
| Ligation linker 2 | CGAATGCTCTGGCCTCTCAAGCACGTGGAT                                                                |
| PCR Primer 1      | CAAGCGTTGGCTTCTCGCATCT                                                                        |
| PCR Primer 2      | AAGCAGTGGTATCAACGCAGAGT                                                                       |
| N501              | AATGATACGGCGACCACCGAGATCTACACTAGATCGCTCGTCGGCAGCG<br>TCAGATGTGTATAAGAGACAG                    |
| N701              | CAAGCAGAAGACGGCATAACGAGATTCGCCTTAGTCTCGTGGGCTCGGAG<br>ATGTGTATAAGAGACAGCAAGCGTTGGCTTCTCGCATCT |
| N702              | CAAGCAGAAGACGGCATAACGAGATCTAGTACGGTCTCGTGGGCTCGGAG<br>ATGTGTATAAGAGACAGCAAGCGTTGGCTTCTCGCATCT |
| N703              | CAAGCAGAAGACGGCATAACGAGATTTCTGCCTGTCTCGTGGGCTCGGAG<br>ATGTGTATAAGAGACAGCAAGCGTTGGCTTCTCGCATCT |
| N704              | CAAGCAGAAGACGGCATAACGAGATGCTCAGGAGTCTCGTGGGCTCGGA<br>GATGTGTATAAGAGACAGCAAGCGTTGGCTTCTCGCATCT |
| N705              | CAAGCAGAAGACGGCATAACGAGATAGGAGTCCGTCTCGTGGGCTCGGA<br>GATGTGTATAAGAGACAGCAAGCGTTGGCTTCTCGCATCT |
| N706              | CAAGCAGAAGACGGCATAACGAGATCATGCCTAGTCTCGTGGGCTCGGAG<br>ATGTGTATAAGAGACAGCAAGCGTTGGCTTCTCGCATCT |
| N707              | CAAGCAGAAGACGGCATAACGAGATGTAGAGAGGTCTCGTGGGCTCGGA<br>GATGTGTATAAGAGACAGCAAGCGTTGGCTTCTCGCATCT |

**Supplementary Table 5. DNA barcode A sequences.**

| Barcode A    | Sequence                                        |
|--------------|-------------------------------------------------|
| Barcode A-1  | /5Phos/AGGCCAGAGCATTCTGAACGTGATGTGGCCGATGTTTCG  |
| Barcode A-2  | /5Phos/AGGCCAGAGCATTCTGAAACATCGGTGGCCGATGTTTCG  |
| Barcode A-3  | /5Phos/AGGCCAGAGCATTCTGATGCCTAAGTGGCCGATGTTTCG  |
| Barcode A-4  | /5Phos/AGGCCAGAGCATTCTGAGTGGTCAGTGGCCGATGTTTCG  |
| Barcode A-5  | /5Phos/AGGCCAGAGCATTCTGACCACTGTGTGGCCGATGTTTCG  |
| Barcode A-6  | /5Phos/AGGCCAGAGCATTCTGACATTGGCGTGGCCGATGTTTCG  |
| Barcode A-7  | /5Phos/AGGCCAGAGCATTCTGCAGATCTGGTGGCCGATGTTTCG  |
| Barcode A-8  | /5Phos/AGGCCAGAGCATTCTGCATCAAGTGTGGCCGATGTTTCG  |
| Barcode A-9  | /5Phos/AGGCCAGAGCATTCTGCGCTGATCGTGGCCGATGTTTCG  |
| Barcode A-10 | /5Phos/AGGCCAGAGCATTCTGACAAGCTAGTGGCCGATGTTTCG  |
| Barcode A-11 | /5Phos/AGGCCAGAGCATTCTGCTGTAGCCGTGGCCGATGTTTCG  |
| Barcode A-12 | /5Phos/AGGCCAGAGCATTCTGAGTACAAGGTGGCCGATGTTTCG  |
| Barcode A-13 | /5Phos/AGGCCAGAGCATTCTGAACAACCAAGTGGCCGATGTTTCG |
| Barcode A-14 | /5Phos/AGGCCAGAGCATTCTGAACCGAGAGTGGCCGATGTTTCG  |
| Barcode A-15 | /5Phos/AGGCCAGAGCATTCTGAACGCTTAGTGGCCGATGTTTCG  |
| Barcode A-16 | /5Phos/AGGCCAGAGCATTCTGAAGACGGAGTGGCCGATGTTTCG  |
| Barcode A-17 | /5Phos/AGGCCAGAGCATTCTGAAGGTACAGTGGCCGATGTTTCG  |
| Barcode A-18 | /5Phos/AGGCCAGAGCATTCTGACACAGAAGTGGCCGATGTTTCG  |
| Barcode A-19 | /5Phos/AGGCCAGAGCATTCTGACAGCAGAGTGGCCGATGTTTCG  |
| Barcode A-20 | /5Phos/AGGCCAGAGCATTCTGACCTCCAAGTGGCCGATGTTTCG  |
| Barcode A-21 | /5Phos/AGGCCAGAGCATTCTGACGCTCGAGTGGCCGATGTTTCG  |
| Barcode A-22 | /5Phos/AGGCCAGAGCATTCTGACGTATCAGTGGCCGATGTTTCG  |
| Barcode A-23 | /5Phos/AGGCCAGAGCATTCTGACTATGCAGTGGCCGATGTTTCG  |
| Barcode A-24 | /5Phos/AGGCCAGAGCATTCTGAGAGTCAAGTGGCCGATGTTTCG  |
| Barcode A-25 | /5Phos/AGGCCAGAGCATTCTGAGATCGCAGTGGCCGATGTTTCG  |
| Barcode A-26 | /5Phos/AGGCCAGAGCATTCTGAGCAGGAAGTGGCCGATGTTTCG  |
| Barcode A-27 | /5Phos/AGGCCAGAGCATTCTGAGTCACTAGTGGCCGATGTTTCG  |
| Barcode A-28 | /5Phos/AGGCCAGAGCATTCTGATCCTGTAGTGGCCGATGTTTCG  |
| Barcode A-29 | /5Phos/AGGCCAGAGCATTCTGATTGAGGAGTGGCCGATGTTTCG  |
| Barcode A-30 | /5Phos/AGGCCAGAGCATTCTGCAACCACAGTGGCCGATGTTTCG  |
| Barcode A-31 | /5Phos/AGGCCAGAGCATTCTGGACTAGTAGTGGCCGATGTTTCG  |
| Barcode A-32 | /5Phos/AGGCCAGAGCATTCTGCAATGGAAGTGGCCGATGTTTCG  |
| Barcode A-33 | /5Phos/AGGCCAGAGCATTCTGCACTTCGAGTGGCCGATGTTTCG  |
| Barcode A-34 | /5Phos/AGGCCAGAGCATTCTGCAGCGTTAGTGGCCGATGTTTCG  |
| Barcode A-35 | /5Phos/AGGCCAGAGCATTCTGCATACCAAGTGGCCGATGTTTCG  |
| Barcode A-36 | /5Phos/AGGCCAGAGCATTCTGCCAGTTCAGTGGCCGATGTTTCG  |
| Barcode A-37 | /5Phos/AGGCCAGAGCATTCTGCCGAAGTAGTGGCCGATGTTTCG  |
| Barcode A-38 | /5Phos/AGGCCAGAGCATTCTGCCGTGAGAGTGGCCGATGTTTCG  |
| Barcode A-39 | /5Phos/AGGCCAGAGCATTCTGCCTCCTGAGTGGCCGATGTTTCG  |
| Barcode A-40 | /5Phos/AGGCCAGAGCATTCTGCGAACTTAGTGGCCGATGTTTCG  |
| Barcode A-41 | /5Phos/AGGCCAGAGCATTCTGCGACTGGAGTGGCCGATGTTTCG  |

|              |                                                 |
|--------------|-------------------------------------------------|
| Barcode A-42 | /5Phos/AGGCCAGAGCATTTCGCGCATACAGTGGCCGATGTTTCG  |
| Barcode A-43 | /5Phos/AGGCCAGAGCATTTCGCTCAATGAGTGGCCGATGTTTCG  |
| Barcode A-44 | /5Phos/AGGCCAGAGCATTTCGCTGAGCCAGTGGCCGATGTTTCG  |
| Barcode A-45 | /5Phos/AGGCCAGAGCATTTCGCTGGCATAAGTGGCCGATGTTTCG |
| Barcode A-46 | /5Phos/AGGCCAGAGCATTTCGGAATCTGAGTGGCCGATGTTTCG  |
| Barcode A-47 | /5Phos/AGGCCAGAGCATTTCGCAAGACTAGTGGCCGATGTTTCG  |
| Barcode A-48 | /5Phos/AGGCCAGAGCATTTCGGAGCTGAAGTGGCCGATGTTTCG  |
| Barcode A-49 | /5Phos/AGGCCAGAGCATTTCGGATAGACAGTGGCCGATGTTTCG  |
| Barcode A-50 | /5Phos/AGGCCAGAGCATTTCGGCCACATAGTGGCCGATGTTTCG  |
| Barcode A-51 | /5Phos/AGGCCAGAGCATTTCGGCGAGTAAGTGGCCGATGTTTCG  |
| Barcode A-52 | /5Phos/AGGCCAGAGCATTTCGGCTAACGAGTGGCCGATGTTTCG  |
| Barcode A-53 | /5Phos/AGGCCAGAGCATTTCGGCTCGGTAGTGGCCGATGTTTCG  |
| Barcode A-54 | /5Phos/AGGCCAGAGCATTTCGGGAGAACAGTGGCCGATGTTTCG  |
| Barcode A-55 | /5Phos/AGGCCAGAGCATTTCGGGTGCGAAGTGGCCGATGTTTCG  |
| Barcode A-56 | /5Phos/AGGCCAGAGCATTTCGGTACGCAAGTGGCCGATGTTTCG  |
| Barcode A-57 | /5Phos/AGGCCAGAGCATTTCGGTCTAGAGTGGCCGATGTTTCG   |
| Barcode A-58 | /5Phos/AGGCCAGAGCATTTCGGTCTGTCAGTGGCCGATGTTTCG  |
| Barcode A-59 | /5Phos/AGGCCAGAGCATTTCGGTGTCTAGTGGCCGATGTTTCG   |
| Barcode A-60 | /5Phos/AGGCCAGAGCATTTCGTAGGATGAGTGGCCGATGTTTCG  |
| Barcode A-61 | /5Phos/AGGCCAGAGCATTTCGTATCAGCAGTGGCCGATGTTTCG  |
| Barcode A-62 | /5Phos/AGGCCAGAGCATTTCGTCCGTCTAGTGGCCGATGTTTCG  |
| Barcode A-63 | /5Phos/AGGCCAGAGCATTTCGTCTTCACAGTGGCCGATGTTTCG  |
| Barcode A-64 | /5Phos/AGGCCAGAGCATTTCGTGAAGAGAGTGGCCGATGTTTCG  |
| Barcode A-65 | /5Phos/AGGCCAGAGCATTTCGTGGAACAAGTGGCCGATGTTTCG  |
| Barcode A-66 | /5Phos/AGGCCAGAGCATTTCGTGGCTTCAGTGGCCGATGTTTCG  |
| Barcode A-67 | /5Phos/AGGCCAGAGCATTTCGTGGTGGTAGTGGCCGATGTTTCG  |
| Barcode A-68 | /5Phos/AGGCCAGAGCATTTCGTTACGCAGTGGCCGATGTTTCG   |
| Barcode A-69 | /5Phos/AGGCCAGAGCATTTCGAACTACCGTGGCCGATGTTTCG   |
| Barcode A-70 | /5Phos/AGGCCAGAGCATTTCGAAGAGATCGTGGCCGATGTTTCG  |
| Barcode A-71 | /5Phos/AGGCCAGAGCATTTCGAAGGACACGTGGCCGATGTTTCG  |
| Barcode A-72 | /5Phos/AGGCCAGAGCATTTCGAATCCGTCGTGGCCGATGTTTCG  |
| Barcode A-73 | /5Phos/AGGCCAGAGCATTTCGAATGTTGCGTGGCCGATGTTTCG  |
| Barcode A-74 | /5Phos/AGGCCAGAGCATTTCGACACGACCGTGGCCGATGTTTCG  |
| Barcode A-75 | /5Phos/AGGCCAGAGCATTTCGACAGATTCGTGGCCGATGTTTCG  |
| Barcode A-76 | /5Phos/AGGCCAGAGCATTTCGAGATGTACGTGGCCGATGTTTCG  |
| Barcode A-77 | /5Phos/AGGCCAGAGCATTTCGAGCACCTCGTGGCCGATGTTTCG  |
| Barcode A-78 | /5Phos/AGGCCAGAGCATTTCGAGCCATGCGTGGCCGATGTTTCG  |
| Barcode A-79 | /5Phos/AGGCCAGAGCATTTCGAGGCTAACGTGGCCGATGTTTCG  |
| Barcode A-80 | /5Phos/AGGCCAGAGCATTTCGATAGCGACGTGGCCGATGTTTCG  |
| Barcode A-81 | /5Phos/AGGCCAGAGCATTTCGATCATTCCGTGGCCGATGTTTCG  |
| Barcode A-82 | /5Phos/AGGCCAGAGCATTTCGATTGGCTCGTGGCCGATGTTTCG  |
| Barcode A-83 | /5Phos/AGGCCAGAGCATTTCGCAAGGAGCGTGGCCGATGTTTCG  |
| Barcode A-84 | /5Phos/AGGCCAGAGCATTTCGCACCTTACGTGGCCGATGTTTCG  |



|               |                                                |
|---------------|------------------------------------------------|
| Barcode A-85  | /5Phos/AGGCCAGAGCATTGCGCCATCCTCGTGGCCGATGTTTCG |
| Barcode A-86  | /5Phos/AGGCCAGAGCATTGCGCCGACAACGTGGCCGATGTTTCG |
| Barcode A-87  | /5Phos/AGGCCAGAGCATTGCGCCTAATCCGTGGCCGATGTTTCG |
| Barcode A-88  | /5Phos/AGGCCAGAGCATTGCGCCTCTATCGTGGCCGATGTTTCG |
| Barcode A-89  | /5Phos/AGGCCAGAGCATTGCGGACACACGTGGCCGATGTTTCG  |
| Barcode A-90  | /5Phos/AGGCCAGAGCATTGCGGGATTGCGTGGCCGATGTTTCG  |
| Barcode A-91  | /5Phos/AGGCCAGAGCATTGCGCTAAGGTCGTGGCCGATGTTTCG |
| Barcode A-92  | /5Phos/AGGCCAGAGCATTGCGAACAGGCGTGGCCGATGTTTCG  |
| Barcode A-93  | /5Phos/AGGCCAGAGCATTGCGGACAGTGCCTGGCCGATGTTTCG |
| Barcode A-94  | /5Phos/AGGCCAGAGCATTGCGGAGTTAGCGTGGCCGATGTTTCG |
| Barcode A-95  | /5Phos/AGGCCAGAGCATTGCGGATGAATCGTGGCCGATGTTTCG |
| Barcode A-96  | /5Phos/AGGCCAGAGCATTGCGCCAAGACGTGGCCGATGTTTCG  |
| Barcode A-97  | /5Phos/AGGCCAGAGCATTGCGCGAAGAAGTGGCCGATGTTTCG  |
| Barcode A-98  | /5Phos/AGGCCAGAGCATTGCGGTGACAAGGTGGCCGATGTTTCG |
| Barcode A-99  | /5Phos/AGGCCAGAGCATTGCGGAACCAGAGTGGCCGATGTTTCG |
| Barcode A-100 | /5Phos/AGGCCAGAGCATTGCTTGCTGGAGTGGCCGATGTTTCG  |

**Supplementary Table 6. DNA barcode B sequences.**

| <b>Barcode B</b> | <b>Sequence</b>                                |
|------------------|------------------------------------------------|
| Barcode B-1      | CAAGCGTTGGCTTCTCGCATCTAACGTGATATCCACGTGCTTGAG  |
| Barcode B-2      | CAAGCGTTGGCTTCTCGCATCTAAACATCGATCCACGTGCTTGAG  |
| Barcode B-3      | CAAGCGTTGGCTTCTCGCATCTATGCCTAAATCCACGTGCTTGAG  |
| Barcode B-4      | CAAGCGTTGGCTTCTCGCATCTAGTGGTCAATCCACGTGCTTGAG  |
| Barcode B-5      | CAAGCGTTGGCTTCTCGCATCTACCACTGTATCCACGTGCTTGAG  |
| Barcode B-6      | CAAGCGTTGGCTTCTCGCATCTACATTGGCATCCACGTGCTTGAG  |
| Barcode B-7      | CAAGCGTTGGCTTCTCGCATCTCAGATCTGATCCACGTGCTTGAG  |
| Barcode B-8      | CAAGCGTTGGCTTCTCGCATCTCATCAAGTATCCACGTGCTTGAG  |
| Barcode B-9      | CAAGCGTTGGCTTCTCGCATCTCGCTGATCATCCACGTGCTTGAG  |
| Barcode B-10     | CAAGCGTTGGCTTCTCGCATCTACAAGCTAATCCACGTGCTTGAG  |
| Barcode B-11     | CAAGCGTTGGCTTCTCGCATCTCTGTAGCCATCCACGTGCTTGAG  |
| Barcode B-12     | CAAGCGTTGGCTTCTCGCATCTAGTACAAGATCCACGTGCTTGAG  |
| Barcode B-13     | CAAGCGTTGGCTTCTCGCATCTAACAACCAATCCACGTGCTTGAG  |
| Barcode B-14     | CAAGCGTTGGCTTCTCGCATCTAACCAGAGAATCCACGTGCTTGAG |
| Barcode B-15     | CAAGCGTTGGCTTCTCGCATCTAACGCTTAATCCACGTGCTTGAG  |
| Barcode B-16     | CAAGCGTTGGCTTCTCGCATCTAAGACGGAATCCACGTGCTTGAG  |
| Barcode B-17     | CAAGCGTTGGCTTCTCGCATCTAAGGTACAATCCACGTGCTTGAG  |
| Barcode B-18     | CAAGCGTTGGCTTCTCGCATCTACACAGAAATCCACGTGCTTGAG  |
| Barcode B-19     | CAAGCGTTGGCTTCTCGCATCTACAGCAGAATCCACGTGCTTGAG  |
| Barcode B-20     | CAAGCGTTGGCTTCTCGCATCTACCTCCAAATCCACGTGCTTGAG  |
| Barcode B-21     | CAAGCGTTGGCTTCTCGCATCTACGCTCGAATCCACGTGCTTGAG  |
| Barcode B-22     | CAAGCGTTGGCTTCTCGCATCTACGTATCAATCCACGTGCTTGAG  |
| Barcode B-23     | CAAGCGTTGGCTTCTCGCATCTACTATGCAATCCACGTGCTTGAG  |
| Barcode B-24     | CAAGCGTTGGCTTCTCGCATCTAGAGTCAAATCCACGTGCTTGAG  |
| Barcode B-25     | CAAGCGTTGGCTTCTCGCATCTAGATCGCAATCCACGTGCTTGAG  |
| Barcode B-26     | CAAGCGTTGGCTTCTCGCATCTAGCAGGAAATCCACGTGCTTGAG  |
| Barcode B-27     | CAAGCGTTGGCTTCTCGCATCTAGTCACTAATCCACGTGCTTGAG  |
| Barcode B-28     | CAAGCGTTGGCTTCTCGCATCTATCCTGTAATCCACGTGCTTGAG  |
| Barcode B-29     | CAAGCGTTGGCTTCTCGCATCTATTGAGGAATCCACGTGCTTGAG  |
| Barcode B-30     | CAAGCGTTGGCTTCTCGCATCTCAACCACAATCCACGTGCTTGAG  |
| Barcode B-31     | CAAGCGTTGGCTTCTCGCATCTGACTAGTAATCCACGTGCTTGAG  |
| Barcode B-32     | CAAGCGTTGGCTTCTCGCATCTCAATGGAAATCCACGTGCTTGAG  |
| Barcode B-33     | CAAGCGTTGGCTTCTCGCATCTCACTTCGAATCCACGTGCTTGAG  |
| Barcode B-34     | CAAGCGTTGGCTTCTCGCATCTCAGCGTTAATCCACGTGCTTGAG  |
| Barcode B-35     | CAAGCGTTGGCTTCTCGCATCTCATAACCAATCCACGTGCTTGAG  |
| Barcode B-36     | CAAGCGTTGGCTTCTCGCATCTCCAGTTCAATCCACGTGCTTGAG  |
| Barcode B-37     | CAAGCGTTGGCTTCTCGCATCTCCGAAGTAATCCACGTGCTTGAG  |
| Barcode B-38     | CAAGCGTTGGCTTCTCGCATCTCCGTGAGAATCCACGTGCTTGAG  |
| Barcode B-39     | CAAGCGTTGGCTTCTCGCATCTCCTCCTGAATCCACGTGCTTGAG  |
| Barcode B-40     | CAAGCGTTGGCTTCTCGCATCTCGAACTTAATCCACGTGCTTGAG  |
| Barcode B-41     | CAAGCGTTGGCTTCTCGCATCTCGACTGGAATCCACGTGCTTGAG  |

|              |                                                |
|--------------|------------------------------------------------|
| Barcode B-42 | CAAGCGTTGGCTTCTCGCATCTCGCATAACAATCCACGTGCTTGAG |
| Barcode B-43 | CAAGCGTTGGCTTCTCGCATCTCTCAATGAATCCACGTGCTTGAG  |
| Barcode B-44 | CAAGCGTTGGCTTCTCGCATCTCTGAGCCAATCCACGTGCTTGAG  |
| Barcode B-45 | CAAGCGTTGGCTTCTCGCATCTCTGGCATAATCCACGTGCTTGAG  |
| Barcode B-46 | CAAGCGTTGGCTTCTCGCATCTGAATCTGAATCCACGTGCTTGAG  |
| Barcode B-47 | CAAGCGTTGGCTTCTCGCATCTCAAGACTAATCCACGTGCTTGAG  |
| Barcode B-48 | CAAGCGTTGGCTTCTCGCATCTGAGCTGAAATCCACGTGCTTGAG  |
| Barcode B-49 | CAAGCGTTGGCTTCTCGCATCTGATAGACAATCCACGTGCTTGAG  |
| Barcode B-50 | CAAGCGTTGGCTTCTCGCATCTGCCACATAATCCACGTGCTTGAG  |
| Barcode B-51 | CAAGCGTTGGCTTCTCGCATCTGCGAGTAAATCCACGTGCTTGAG  |
| Barcode B-52 | CAAGCGTTGGCTTCTCGCATCTGCTAACGAATCCACGTGCTTGAG  |
| Barcode B-53 | CAAGCGTTGGCTTCTCGCATCTGCTCGGTAATCCACGTGCTTGAG  |
| Barcode B-54 | CAAGCGTTGGCTTCTCGCATCTGGAGAACAATCCACGTGCTTGAG  |
| Barcode B-55 | CAAGCGTTGGCTTCTCGCATCTGGTGCGAAATCCACGTGCTTGAG  |
| Barcode B-56 | CAAGCGTTGGCTTCTCGCATCTGTACGCAAATCCACGTGCTTGAG  |
| Barcode B-57 | CAAGCGTTGGCTTCTCGCATCTGTCTGAGAATCCACGTGCTTGAG  |
| Barcode B-58 | CAAGCGTTGGCTTCTCGCATCTGTCTGTCAATCCACGTGCTTGAG  |
| Barcode B-59 | CAAGCGTTGGCTTCTCGCATCTGTGTTCTAATCCACGTGCTTGAG  |
| Barcode B-60 | CAAGCGTTGGCTTCTCGCATCTTAGGATGAATCCACGTGCTTGAG  |
| Barcode B-61 | CAAGCGTTGGCTTCTCGCATCTTATCAGCAATCCACGTGCTTGAG  |
| Barcode B-62 | CAAGCGTTGGCTTCTCGCATCTTCCGTCTAATCCACGTGCTTGAG  |
| Barcode B-63 | CAAGCGTTGGCTTCTCGCATCTTCTTACAATCCACGTGCTTGAG   |
| Barcode B-64 | CAAGCGTTGGCTTCTCGCATCTTGAAGAGAATCCACGTGCTTGAG  |
| Barcode B-65 | CAAGCGTTGGCTTCTCGCATCTTGAACAAATCCACGTGCTTGAG   |
| Barcode B-66 | CAAGCGTTGGCTTCTCGCATCTTGGCTTCAATCCACGTGCTTGAG  |
| Barcode B-67 | CAAGCGTTGGCTTCTCGCATCTTGGTGGTAATCCACGTGCTTGAG  |
| Barcode B-68 | CAAGCGTTGGCTTCTCGCATCTTTCACGCAATCCACGTGCTTGAG  |
| Barcode B-69 | CAAGCGTTGGCTTCTCGCATCTAACTCACCATCCACGTGCTTGAG  |
| Barcode B-70 | CAAGCGTTGGCTTCTCGCATCTAAGAGATCATCCACGTGCTTGAG  |
| Barcode B-71 | CAAGCGTTGGCTTCTCGCATCTAAGGACACATCCACGTGCTTGAG  |
| Barcode B-72 | CAAGCGTTGGCTTCTCGCATCTAATCCGTCATCCACGTGCTTGAG  |
| Barcode B-73 | CAAGCGTTGGCTTCTCGCATCTAATGTTGCATCCACGTGCTTGAG  |
| Barcode B-74 | CAAGCGTTGGCTTCTCGCATCTACACGACCATCCACGTGCTTGAG  |
| Barcode B-75 | CAAGCGTTGGCTTCTCGCATCTACAGATTCATCCACGTGCTTGAG  |
| Barcode B-76 | CAAGCGTTGGCTTCTCGCATCTAGATGTACATCCACGTGCTTGAG  |
| Barcode B-77 | CAAGCGTTGGCTTCTCGCATCTAGCACCTCATCCACGTGCTTGAG  |
| Barcode B-78 | CAAGCGTTGGCTTCTCGCATCTAGCCATGCATCCACGTGCTTGAG  |
| Barcode B-79 | CAAGCGTTGGCTTCTCGCATCTAGGCTAACATCCACGTGCTTGAG  |
| Barcode B-80 | CAAGCGTTGGCTTCTCGCATCTATAGCGACATCCACGTGCTTGAG  |
| Barcode B-81 | CAAGCGTTGGCTTCTCGCATCTATCATTCCATCCACGTGCTTGAG  |
| Barcode B-82 | CAAGCGTTGGCTTCTCGCATCTATTGGCTCATCCACGTGCTTGAG  |
| Barcode B-83 | CAAGCGTTGGCTTCTCGCATCTCAAGGAGCATCCACGTGCTTGAG  |
| Barcode B-84 | CAAGCGTTGGCTTCTCGCATCTCACCTTACATCCACGTGCTTGAG  |

|               |                                               |
|---------------|-----------------------------------------------|
| Barcode B-85  | CAAGCGTTGGCTTCTCGCATCTCCATCCTCATCCACGTGCTTGAG |
| Barcode B-86  | CAAGCGTTGGCTTCTCGCATCTCCGACAACATCCACGTGCTTGAG |
| Barcode B-87  | CAAGCGTTGGCTTCTCGCATCTCCTAATCCATCCACGTGCTTGAG |
| Barcode B-88  | CAAGCGTTGGCTTCTCGCATCTCCTCTATCATCCACGTGCTTGAG |
| Barcode B-89  | CAAGCGTTGGCTTCTCGCATCTCGACACACATCCACGTGCTTGAG |
| Barcode B-90  | CAAGCGTTGGCTTCTCGCATCTCGGATTGCATCCACGTGCTTGAG |
| Barcode B-91  | CAAGCGTTGGCTTCTCGCATCTCTAAGGTCATCCACGTGCTTGAG |
| Barcode B-92  | CAAGCGTTGGCTTCTCGCATCTGAACAGGCATCCACGTGCTTGAG |
| Barcode B-93  | CAAGCGTTGGCTTCTCGCATCTGACAGTGCATCCACGTGCTTGAG |
| Barcode B-94  | CAAGCGTTGGCTTCTCGCATCTGAGTTAGCATCCACGTGCTTGAG |
| Barcode B-95  | CAAGCGTTGGCTTCTCGCATCTGATGAATCATCCACGTGCTTGAG |
| Barcode B-96  | CAAGCGTTGGCTTCTCGCATCTGCCAAGACATCCACGTGCTTGAG |
| Barcode B-97  | CAAGCGTTGGCTTCTCGCATCTCGGAAGAAATCCACGTGCTTGAG |
| Barcode B-98  | CAAGCGTTGGCTTCTCGCATCTGTGACAAGATCCACGTGCTTGAG |
| Barcode B-99  | CAAGCGTTGGCTTCTCGCATCTGAACCAGAATCCACGTGCTTGAG |
| Barcode B-100 | CAAGCGTTGGCTTCTCGCATCTTTGCTGGAATCCACGTGCTTGAG |

**Supplementary Table 7. Chemicals and reagents.**

| <b>Name</b>                                     | <b>Catalog number</b> | <b>Vender</b>             |
|-------------------------------------------------|-----------------------|---------------------------|
| Formaldehyde solution                           | PI28906               | Thermo Fisher Scientific  |
| HEPES pH 7.5                                    | BBH-75-250            | Boston BioProducts        |
| Glycine                                         | 50046                 | Sigma-Aldrich             |
| NaCl                                            | AM9760G               | Thermo Fisher Scientific  |
| Digitonin                                       | G9441                 | Promega                   |
| MgCl <sub>2</sub>                               | AM9530G               | Thermo Fisher Scientific  |
| Spermidine                                      | S0266                 | Sigma-Aldrich             |
| EDTA-free Protease Inhibitor Cocktail           | 11873580001           | Millipore Sigma           |
| NP40                                            | 11332473001           | Sigma-Aldrich             |
| EDTA Solution pH 8.0                            | AB00502               | AmericanBio               |
| Bovine Serum Albumin (BSA)                      | A8806                 | Sigma-Aldrich             |
| Anti-H3K27ac antibody                           | ab177178              | Abcam                     |
| Anti-H3K27me3 antibody                          | 9733                  | Cell Signaling Technology |
| Histone H3K4me3 antibody                        | 39159                 | Active Motif              |
| Secondary antibody (Guinea Pig anti-Rabbit IgG) | ABIN101961            | Antibodies-Online         |
| pA-Tn5 Transposase – unloaded                   | C01070002             | Diagenode                 |
| Triton X-100                                    | T8787                 | Sigma-Aldrich             |
| T4 DNA Ligase                                   | M0202L                | New England Biolabs       |
| T4 DNA Ligase Reaction Buffer                   | B0202S                | New England Biolabs       |
| NEBuffer 3.1                                    | B7203S                | New England Biolabs       |
| DPBS                                            | 14190144              | Thermo Fisher Scientific  |
| Proteinase K                                    | EO0491                | Thermo Fisher Scientific  |
| Ampure XP beads                                 | A63880                | Beckman Coulter           |
| NEBNext High-Fidelity 2X PCR Master Mix         | M0541L                | New England Biolabs       |
| SYBR Green I Nucleic Acid Gel Stain             | S7563                 | Thermo Fisher Scientific  |
| DNA Clean & Concentrator-5                      | D4014                 | Zymo Research             |
| Tn5 Transposase - unloaded                      | C01070010             | Diagenode                 |
| Tagmentation Buffer (2x)                        | C01019043             | Diagenode                 |
| Sodium dodecyl sulfate                          | 71736                 | Sigma-Aldrich             |
| Maxima H Minus Reverse Transcriptase (200 U/L)  | EP0751                | Thermo Fisher Scientific  |
| dNTP mix                                        | R0192                 | Thermo Fisher Scientific  |
| SUPERased In RNase Inhibitor                    | AM2694                | Thermo Fisher Scientific  |
| Ampure XP beads                                 | A63880                | Beckman Coulter           |
| Dynabeads MyOne C1                              | 65001                 | Thermo Fisher Scientific  |
| RNase Inhibitor                                 | Y9240L                | Enzymatics                |
| Kapa Hotstart HiFi ReadyMix                     | KK2601                | Kapa Biosystems           |
| Nextera XT DNA Preparation Kit                  | FC-131-1024           | Illumina                  |
